# Supplementary material for: Cruciform π-systems: effect of aggregation on emission
Source: Royal Society of Chemistry journal article supplement (doi:10.1039/b406495j), 2004-01-01
Supplement: b406495j.pdf [file b406495j.pdf]

## Cruciform $\pi$ -systems: Effect of aggregation on emission

James N. Wilson,<sup>†</sup> Mark D. Smith,<sup>‡</sup> Volker Enkelmann,<sup>§</sup> and Uwe H. F. Bunz<sup>\*,†</sup>

*Department of Chemistry and Biochemistry, Georgia Institute of Technology, 770 State St, Atlanta, GA 30332 USA. Department of Chemistry and Biochemistry, University of South Carolina, Columbia, SC 29908, USA and Max-Planck Institut für Polymerforschung, D-55021 Mainz Postfach 3148, FRG Fax: 01 404 385 1795; Tel: 01 404 385 1795; E-mail: [uwe.bunz@chemistry.gatech.edu](mailto:uwe.bunz@chemistry.gatech.edu)*

### SUPPLEMENTARY INFORMATION

#### X-Ray Structure Determination, C<sub>54</sub>H<sub>60</sub>N<sub>2</sub>

An orange bar was mounted onto the end of a thin glass fiber using inert oil. X-ray intensity data were measured at 200.0(2) K in the nitrogen cold stream of a Bruker SMART APEX CCD-based diffractometer (Mo K $\alpha$  radiation,  $\lambda = 0.71073$  Å).<sup>1</sup> Attempts to cool the crystal further resulted in fracturing and destruction of the sample. The raw data frames were integrated with SAINT+,<sup>1</sup> which also applied corrections for Lorentz and polarization effects. The final unit cell parameters are based on the least-squares refinement of 5751 reflections with  $I > 5(\sigma)I$  from the data set. Analysis of the data showed negligible crystal decay during data collection.

Systematic absences in the intensity data were consistent with the space group P2<sub>1</sub>/c. The structure was solved by a combination of direct methods and difference Fourier syntheses, and refined by full-matrix least-squares against F<sup>2</sup>, using the SHELXTL software package.<sup>2</sup> The molecule possesses no crystallographically imposed symmetry. Three of the four butyl groups (C19 – C22, C39 – C42, C43 – C46) are afflicted by disorder. These chains were modeled as occupying two conformations, A and B. The site occupation factors (sofs) for each disorder component were refined, constrained to sum to unity for that component. The final values are near A = 0.60 / B = 0.40 for all three. Additionally, a total of 38 restraints were employed to maintain a chemically reasonable geometry for the disordered groups; however, some displacement parameters of these atoms show highly anisotropic motion, indicating the twofold disorder model is inadequate, and that more conformations are present. These were not modeled. Eventually all non-hydrogen atoms were refined with anisotropic displacement parameters; hydrogen atoms were placed in geometrically calculated positions and refined as standard riding atoms.

(1) SMART Version 5.625 and SAINT+ Version 6.02a. Bruker Analytical X-ray Systems, Inc., Madison, Wisconsin, USA, 1998.

(2) Sheldrick, G. M. SHELXTL Version 5.1; Bruker Analytical X-ray Systems, Inc., Madison, Wisconsin, USA, 1997.

**Table 1. Crystal data and structure refinement.**

|                                 |                                                |                                |
|---------------------------------|------------------------------------------------|--------------------------------|
| Identification code             | j111a1s                                        |                                |
| Empirical formula               | C <sub>54</sub> H <sub>60</sub> N <sub>2</sub> |                                |
| Formula weight                  | 737.04                                         |                                |
| Temperature                     | 200.0(2) K                                     |                                |
| Wavelength                      | 0.71073 Å                                      |                                |
| Crystal system                  | Monoclinic                                     |                                |
| Space group                     | P2 <sub>1</sub> /c                             |                                |
| Unit cell dimensions            | a = 14.7777(7) Å                               | $\alpha = 90^\circ$ .          |
|                                 | b = 19.5961(9) Å                               | $\beta = 115.6340(10)^\circ$ . |
|                                 | c = 16.7434(8) Å                               | $\gamma = 90^\circ$ .          |
| Volume                          | 4371.4(4) Å <sup>3</sup>                       |                                |
| Z                               | 4                                              |                                |
| Density (calculated)            | 1.120 Mg/m <sup>3</sup>                        |                                |
| Absorption coefficient          | 0.064 mm <sup>-1</sup>                         |                                |
| F(000)                          | 1592                                           |                                |
| Crystal size                    | 0.58 x 0.40 x 0.36 mm <sup>3</sup>             |                                |
| Theta range for data collection | 1.70 to 23.28°.                                |                                |
| Index ranges                    | -14 < h <= 16, -21 <= k <= 21, -18 <= l <= 18  |                                |
| Reflections collected           | 26282                                          |                                |

|                                   |                                             |
|-----------------------------------|---------------------------------------------|
| Independent reflections           | 6288 [R(int) = 0.0406]                      |
| Completeness to theta = 23.28°    | 99.9 %                                      |
| Absorption correction             | None                                        |
| Refinement method                 | Full-matrix least-squares on F <sup>2</sup> |
| Data / restraints / parameters    | 6288 / 38 / 590                             |
| Goodness-of-fit on F <sup>2</sup> | 0.977                                       |
| Final R indices [I>2sigma(I)]     | R1 = 0.0541, wR2 = 0.1400                   |
| R indices (all data)              | R1 = 0.0840, wR2 = 0.1519                   |
| Extinction coefficient            | 0.0037(5)                                   |
| Largest diff. peak and hole       | 0.235 and -0.160 e.Å <sup>-3</sup>          |

**Table 2. Atomic coordinates (x 10<sup>4</sup>) and equivalent isotropic displacement parameters (Å<sup>2</sup>x 10<sup>3</sup>) for j111a1s. U(eq) is defined as one third of the trace of the orthogonalized U<sup>ij</sup> tensor.**

|        | x         | y       | z        | U(eq)  |
|--------|-----------|---------|----------|--------|
| C(1)   | 950(2)    | 5456(1) | 6161(1)  | 67(1)  |
| C(2)   | 1797(2)   | 5767(1) | 6140(1)  | 69(1)  |
| C(3)   | 2511(2)   | 5376(1) | 6011(2)  | 72(1)  |
| C(4)   | 2429(2)   | 4672(1) | 5904(2)  | 71(1)  |
| C(5)   | 1579(2)   | 4358(1) | 5919(1)  | 69(1)  |
| C(6)   | 866(2)    | 4748(1) | 6033(2)  | 72(1)  |
| C(7)   | 188(2)    | 5845(1) | 6295(2)  | 72(1)  |
| C(8)   | -565(2)   | 5589(1) | 6428(2)  | 74(1)  |
| C(9)   | -1379(2)  | 5932(1) | 6530(2)  | 70(1)  |
| C(10)  | -2103(2)  | 5556(1) | 6656(2)  | 79(1)  |
| C(11)  | -2908(2)  | 5845(1) | 6740(2)  | 79(1)  |
| C(12)  | -3037(2)  | 6551(1) | 6700(2)  | 84(1)  |
| C(13)  | -2311(3)  | 6931(1) | 6578(2)  | 96(1)  |
| C(14)  | -1512(2)  | 6638(1) | 6496(2)  | 85(1)  |
| C(15)  | -4621(2)  | 6453(2) | 6872(2)  | 103(1) |
| C(16)  | -4285(3)  | 6245(2) | 7850(2)  | 122(1) |
| C(17)  | -4950(3)  | 5816(2) | 8051(3)  | 142(1) |
| C(18)  | -4572(3)  | 5664(2) | 9019(2)  | 151(2) |
| N(1A)  | -3847(2)  | 6847(1) | 6767(2)  | 113(1) |
| C(19A) | -3664(7)  | 7624(3) | 7142(6)  | 103(2) |
| C(20A) | -4252(5)  | 8044(4) | 6351(5)  | 130(2) |
| C(21A) | -4217(13) | 8825(6) | 6623(12) | 179(6) |
| C(22A) | -3301(13) | 9072(9) | 6658(14) | 228(9) |
| N(1B)  | -3847(2)  | 6847(1) | 6767(2)  | 113(1) |
| C(19B) | -4257(5)  | 7505(4) | 6354(5)  | 65(2)  |
| C(20B) | -3866(9)  | 7990(4) | 7146(6)  | 87(3)  |
| C(21B) | -4114(12) | 8733(4) | 6800(11) | 85(4)  |
| C(22B) | -3294(7)  | 9011(7) | 6665(10) | 77(4)  |
| C(23)  | 1949(2)   | 6497(1) | 6262(2)  | 69(1)  |
| C(24)  | 2073(2)   | 7092(1) | 6348(2)  | 72(1)  |
| C(25)  | 2222(2)   | 7822(1) | 6441(2)  | 67(1)  |
| C(26)  | 1412(2)   | 8257(1) | 6115(2)  | 80(1)  |
| C(27)  | 1549(2)   | 8949(1) | 6211(2)  | 92(1)  |
| C(28)  | 2496(3)   | 9218(1) | 6633(2)  | 87(1)  |
| C(29)  | 3308(2)   | 8793(2) | 6957(2)  | 89(1)  |
| C(30)  | 3176(2)   | 8096(1) | 6859(2)  | 80(1)  |
| C(31)  | 3186(2)   | 4239(1) | 5808(2)  | 83(1)  |
| C(32)  | 4019(2)   | 4415(1) | 5792(2)  | 81(1)  |
| C(33)  | 4792(2)   | 3952(1) | 5752(2)  | 76(1)  |
| C(34)  | 5621(2)   | 4200(1) | 5684(2)  | 78(1)  |
| C(35)  | 6366(2)   | 3778(1) | 5682(2)  | 75(1)  |
| C(36)  | 6329(2)   | 3068(1) | 5768(2)  | 75(1)  |
| C(37)  | 5472(3)   | 2813(1) | 5826(2)  | 93(1)  |
| C(38)  | 4726(2)   | 3247(2) | 5814(2)  | 87(1)  |
| C(39A) | 7948(2)   | 2919(1) | 5732(2)  | 85(1)  |

|        |           |          |          |         |
|--------|-----------|----------|----------|---------|
| C(40A) | 8637(5)   | 3124(3)  | 6726(4)  | 76(2)   |
| C(41A) | 9511(5)   | 3531(3)  | 6748(5)  | 98(2)   |
| C(42A) | 10299(15) | 3725(10) | 7639(9)  | 119(4)  |
| C(39B) | 7948(2)   | 2919(1)  | 5732(2)  | 85(1)   |
| C(40B) | 8816(8)   | 3359(6)  | 6300(8)  | 113(4)  |
| C(41B) | 9474(11)  | 3045(5)  | 7110(6)  | 113(4)  |
| C(42B) | 10280(20) | 3518(16) | 7738(18) | 133(9)  |
| C(43A) | 7242(7)   | 1953(3)  | 6227(5)  | 95(2)   |
| C(44A) | 7030(8)   | 1449(3)  | 5581(5)  | 144(3)  |
| C(45A) | 7354(4)   | 740(2)   | 6054(3)  | 156(2)  |
| C(46A) | 8302(3)   | 479(2)   | 6135(3)  | 155(2)  |
| C(43B) | 6900(8)   | 1919(5)  | 5621(10) | 107(4)  |
| C(44B) | 7546(11)  | 1506(6)  | 6276(12) | 244(12) |
| C(45B) | 7354(4)   | 740(2)   | 6054(3)  | 156(2)  |
| C(46B) | 8302(3)   | 479(2)   | 6135(3)  | 155(2)  |
| C(47)  | 1451(2)   | 3625(1)  | 5823(2)  | 72(1)   |
| C(48)  | 1384(2)   | 3027(1)  | 5764(2)  | 71(1)   |
| C(49)  | 1338(2)   | 2296(1)  | 5673(2)  | 69(1)   |
| C(50)  | 1771(2)   | 1979(1)  | 5190(2)  | 86(1)   |
| C(51)  | 1738(3)   | 1283(2)  | 5088(2)  | 106(1)  |
| C(52)  | 1281(3)   | 892(2)   | 5466(3)  | 111(1)  |
| C(53)  | 860(3)    | 1184(2)  | 5970(2)  | 114(1)  |
| C(54)  | 892(2)    | 1892(2)  | 6075(2)  | 97(1)   |
| N(2)   | 7084(2)   | 2651(1)  | 5786(2)  | 99(1)   |

**Table 3. Bond lengths [Å] and angles [°].**

|               |           |               |           |
|---------------|-----------|---------------|-----------|
| C(1)-C(6)     | 1.401(3)  | C(26)-C(27)   | 1.371(3)  |
| C(1)-C(2)     | 1.407(3)  | C(27)-C(28)   | 1.371(4)  |
| C(1)-C(7)     | 1.457(3)  | C(28)-C(29)   | 1.365(4)  |
| C(2)-C(3)     | 1.394(3)  | C(29)-C(30)   | 1.378(3)  |
| C(2)-C(23)    | 1.448(3)  | C(31)-C(32)   | 1.290(3)  |
| C(3)-C(4)     | 1.391(3)  | C(32)-C(33)   | 1.482(4)  |
| C(4)-C(5)     | 1.409(3)  | C(33)-C(34)   | 1.368(3)  |
| C(4)-C(31)    | 1.465(3)  | C(33)-C(38)   | 1.392(3)  |
| C(5)-C(6)     | 1.380(3)  | C(34)-C(35)   | 1.378(3)  |
| C(5)-C(47)    | 1.449(3)  | C(35)-C(36)   | 1.402(3)  |
| C(7)-C(8)     | 1.323(3)  | C(36)-N(2)    | 1.372(3)  |
| C(8)-C(9)     | 1.451(3)  | C(36)-C(37)   | 1.403(4)  |
| C(9)-C(10)    | 1.387(3)  | C(37)-C(38)   | 1.386(4)  |
| C(9)-C(14)    | 1.395(3)  | C(39A)-N(2)   | 1.419(3)  |
| C(10)-C(11)   | 1.379(3)  | C(39A)-C(40A) | 1.582(6)  |
| C(11)-C(12)   | 1.393(3)  | C(40A)-C(41A) | 1.504(9)  |
| C(12)-N(1A)   | 1.379(4)  | C(41A)-C(42A) | 1.491(12) |
| C(12)-C(13)   | 1.392(4)  | C(40B)-C(41B) | 1.422(14) |
| C(13)-C(14)   | 1.372(4)  | C(41B)-C(42B) | 1.515(17) |
| C(15)-N(1A)   | 1.453(4)  | C(43A)-C(44A) | 1.397(8)  |
| C(15)-C(16)   | 1.546(4)  | C(43A)-N(2)   | 1.525(7)  |
| C(16)-C(17)   | 1.439(4)  | C(44A)-C(45A) | 1.568(8)  |
| C(17)-C(18)   | 1.498(4)  | C(45A)-C(46A) | 1.441(5)  |
| N(1A)-C(19A)  | 1.625(7)  | C(43B)-C(44B) | 1.366(15) |
| C(19A)-C(20A) | 1.479(10) | C(43B)-N(2)   | 1.463(11) |
| C(20A)-C(21A) | 1.592(9)  | C(47)-C(48)   | 1.176(3)  |
| C(21A)-C(22A) | 1.416(15) | C(48)-C(49)   | 1.438(4)  |
| C(19B)-C(20B) | 1.527(12) | C(49)-C(50)   | 1.377(3)  |
| C(20B)-C(21B) | 1.551(10) | C(49)-C(54)   | 1.377(3)  |
| C(21B)-C(22B) | 1.433(14) | C(50)-C(51)   | 1.374(4)  |
| C(23)-C(24)   | 1.180(3)  | C(51)-C(52)   | 1.346(4)  |
| C(24)-C(25)   | 1.446(3)  | C(52)-C(53)   | 1.370(4)  |
| C(25)-C(26)   | 1.375(3)  | C(53)-C(54)   | 1.397(4)  |
| C(25)-C(30)   | 1.382(3)  |               |           |

|                      |           |                      |           |
|----------------------|-----------|----------------------|-----------|
| C(6)-C(1)-C(2)       | 116.5(2)  | C(27)-C(26)-C(25)    | 120.5(3)  |
| C(6)-C(1)-C(7)       | 121.2(3)  | C(26)-C(27)-C(28)    | 120.4(3)  |
| C(2)-C(1)-C(7)       | 122.2(2)  | C(29)-C(28)-C(27)    | 119.8(3)  |
| C(3)-C(2)-C(1)       | 120.5(2)  | C(28)-C(29)-C(30)    | 120.2(3)  |
| C(3)-C(2)-C(23)      | 118.9(2)  | C(29)-C(30)-C(25)    | 120.3(3)  |
| C(1)-C(2)-C(23)      | 120.6(2)  | C(32)-C(31)-C(4)     | 128.9(3)  |
| C(4)-C(3)-C(2)       | 122.4(3)  | C(31)-C(32)-C(33)    | 126.8(3)  |
| C(3)-C(4)-C(5)       | 117.4(2)  | C(34)-C(33)-C(38)    | 116.9(3)  |
| C(3)-C(4)-C(31)      | 124.0(3)  | C(34)-C(33)-C(32)    | 121.5(2)  |
| C(5)-C(4)-C(31)      | 118.6(2)  | C(38)-C(33)-C(32)    | 121.6(3)  |
| C(6)-C(5)-C(4)       | 120.1(2)  | C(33)-C(34)-C(35)    | 122.2(2)  |
| C(6)-C(5)-C(47)      | 119.6(2)  | C(34)-C(35)-C(36)    | 121.9(3)  |
| C(4)-C(5)-C(47)      | 120.3(2)  | N(2)-C(36)-C(35)     | 121.7(3)  |
| C(5)-C(6)-C(1)       | 123.2(3)  | N(2)-C(36)-C(37)     | 122.4(3)  |
| C(8)-C(7)-C(1)       | 126.1(2)  | C(35)-C(36)-C(37)    | 115.9(3)  |
| C(7)-C(8)-C(9)       | 130.1(2)  | C(38)-C(37)-C(36)    | 121.1(3)  |
| C(10)-C(9)-C(14)     | 115.3(3)  | C(37)-C(38)-C(33)    | 122.0(3)  |
| C(10)-C(9)-C(8)      | 120.4(2)  | N(2)-C(39A)-C(40A)   | 102.4(3)  |
| C(14)-C(9)-C(8)      | 124.3(3)  | C(41A)-C(40A)-C(39A) | 108.5(6)  |
| C(11)-C(10)-C(9)     | 123.6(2)  | C(42A)-C(41A)-C(40A) | 116.8(10) |
| C(10)-C(11)-C(12)    | 120.6(3)  | C(40B)-C(41B)-C(42B) | 114.0(16) |
| N(1A)-C(12)-C(13)    | 122.5(3)  | C(44A)-C(43A)-N(2)   | 108.9(6)  |
| N(1A)-C(12)-C(11)    | 121.3(3)  | C(43A)-C(44A)-C(45A) | 108.6(6)  |
| C(13)-C(12)-C(11)    | 116.2(3)  | C(46A)-C(45A)-C(44A) | 115.7(5)  |
| C(14)-C(13)-C(12)    | 122.8(3)  | C(44B)-C(43B)-N(2)   | 114.9(12) |
| C(13)-C(14)-C(9)     | 121.6(3)  | C(48)-C(47)-C(5)     | 177.6(3)  |
| N(1A)-C(15)-C(16)    | 111.1(3)  | C(47)-C(48)-C(49)    | 177.1(3)  |
| C(17)-C(16)-C(15)    | 117.6(3)  | C(50)-C(49)-C(54)    | 118.0(3)  |
| C(16)-C(17)-C(18)    | 113.4(3)  | C(50)-C(49)-C(48)    | 119.9(2)  |
| C(12)-N(1A)-C(15)    | 122.9(2)  | C(54)-C(49)-C(48)    | 122.0(3)  |
| C(12)-N(1A)-C(19A)   | 114.9(4)  | C(51)-C(50)-C(49)    | 121.3(3)  |
| C(15)-N(1A)-C(19A)   | 117.3(4)  | C(52)-C(51)-C(50)    | 120.3(3)  |
| C(20A)-C(19A)-N(1A)  | 103.9(7)  | C(51)-C(52)-C(53)    | 120.4(3)  |
| C(19A)-C(20A)-C(21A) | 110.2(10) | C(52)-C(53)-C(54)    | 119.5(3)  |
| C(22A)-C(21A)-C(20A) | 104.6(12) | C(49)-C(54)-C(53)    | 120.5(3)  |
| C(19B)-C(20B)-C(21B) | 108.7(8)  | C(36)-N(2)-C(39A)    | 121.6(2)  |
| C(22B)-C(21B)-C(20B) | 109.6(10) | C(36)-N(2)-C(43B)    | 119.8(6)  |
| C(24)-C(23)-C(2)     | 178.8(2)  | C(39A)-N(2)-C(43B)   | 116.7(6)  |
| C(23)-C(24)-C(25)    | 179.3(2)  | C(36)-N(2)-C(43A)    | 119.8(3)  |
| C(26)-C(25)-C(30)    | 118.8(2)  | C(39A)-N(2)-C(43A)   | 114.1(4)  |
| C(26)-C(25)-C(24)    | 120.3(2)  | C(43B)-N(2)-C(43A)   | 35.8(4)   |
| C(30)-C(25)-C(24)    | 120.9(2)  |                      |           |

**Table 4. Anisotropic displacement parameters ( $\text{\AA}^2 \times 10^3$ ). The anisotropic displacement factor exponent takes the form:  $-2\pi^2 [h^2 a^{*2} U^{11} + \dots + 2 h k a^* b^* U^{12}]$**

|       | $U^{11}$ | $U^{22}$ | $U^{33}$ | $U^{23}$ | $U^{13}$ | $U^{12}$ |
|-------|----------|----------|----------|----------|----------|----------|
| C(1)  | 77(2)    | 63(2)    | 59(2)    | 2(1)     | 27(1)    | 1(1)     |
| C(2)  | 81(2)    | 66(2)    | 57(2)    | 1(1)     | 28(1)    | 0(2)     |
| C(3)  | 75(2)    | 73(2)    | 66(2)    | -4(1)    | 29(1)    | -8(1)    |
| C(4)  | 78(2)    | 70(2)    | 63(2)    | -5(1)    | 28(1)    | 5(2)     |
| C(5)  | 73(2)    | 65(2)    | 63(2)    | -2(1)    | 24(1)    | -2(2)    |
| C(6)  | 76(2)    | 66(2)    | 71(2)    | 1(1)     | 29(1)    | 0(1)     |
| C(7)  | 88(2)    | 60(1)    | 67(2)    | 2(1)     | 32(2)    | 6(2)     |
| C(8)  | 87(2)    | 61(1)    | 75(2)    | 4(1)     | 35(2)    | 6(2)     |
| C(9)  | 82(2)    | 59(2)    | 66(2)    | 4(1)     | 31(1)    | 10(2)    |
| C(10) | 92(2)    | 59(1)    | 89(2)    | -1(1)    | 43(2)    | 3(2)     |
| C(11) | 87(2)    | 69(2)    | 85(2)    | -1(1)    | 40(2)    | 5(2)     |
| C(12) | 95(2)    | 77(2)    | 86(2)    | 12(1)    | 46(2)    | 15(2)    |

|        |         |         |         |        |          |         |
|--------|---------|---------|---------|--------|----------|---------|
| C(13)  | 127(3)  | 62(2)   | 122(2)  | 19(2)  | 76(2)    | 24(2)   |
| C(14)  | 100(2)  | 68(2)   | 101(2)  | 14(1)  | 56(2)    | 8(2)    |
| C(15)  | 89(2)   | 107(2)  | 113(3)  | -5(2)  | 43(2)    | 9(2)    |
| C(16)  | 133(3)  | 133(3)  | 121(3)  | -23(2) | 75(3)    | -32(2)  |
| C(17)  | 133(3)  | 146(3)  | 149(4)  | 0(3)   | 63(3)    | -10(3)  |
| C(18)  | 152(4)  | 195(4)  | 108(3)  | 26(3)  | 57(3)    | 14(3)   |
| N(1A)  | 134(3)  | 78(2)   | 163(3)  | 26(2)  | 99(2)    | 35(2)   |
| C(19A) | 110(5)  | 98(6)   | 99(5)   | 15(4)  | 42(4)    | 33(4)   |
| C(20A) | 154(6)  | 88(5)   | 123(6)  | -2(4)  | 36(5)    | 23(4)   |
| C(21A) | 184(14) | 183(14) | 149(9)  | 16(8)  | 53(9)    | -38(10) |
| C(22A) | 320(20) | 143(13) | 204(18) | 17(11) | 102(15)  | -43(12) |
| N(1B)  | 134(3)  | 78(2)   | 163(3)  | 26(2)  | 99(2)    | 35(2)   |
| C(19B) | 66(5)   | 72(6)   | 54(5)   | -3(3)  | 22(4)    | 11(4)   |
| C(20B) | 94(7)   | 100(9)  | 47(5)   | 11(5)  | 11(4)    | 20(6)   |
| C(21B) | 110(10) | 42(5)   | 126(10) | -19(5) | 71(8)    | 9(6)    |
| C(22B) | 57(6)   | 71(7)   | 113(10) | 27(7)  | 46(6)    | 12(6)   |
| C(23)  | 81(2)   | 67(2)   | 61(2)   | -1(1)  | 32(1)    | -3(1)   |
| C(24)  | 84(2)   | 76(2)   | 62(2)   | -3(1)  | 37(1)    | -3(2)   |
| C(25)  | 84(2)   | 64(2)   | 57(1)   | -3(1)  | 35(1)    | -5(2)   |
| C(26)  | 79(2)   | 72(2)   | 83(2)   | 7(1)   | 28(2)    | -10(2)  |
| C(27)  | 95(2)   | 73(2)   | 100(2)  | 12(2)  | 34(2)    | 5(2)    |
| C(28)  | 108(3)  | 65(2)   | 84(2)   | -4(1)  | 37(2)    | -6(2)   |
| C(29)  | 89(2)   | 87(2)   | 83(2)   | -16(2) | 29(2)    | -20(2)  |
| C(30)  | 78(2)   | 77(2)   | 80(2)   | -10(1) | 30(2)    | -1(2)   |
| C(31)  | 84(2)   | 84(2)   | 81(2)   | -10(1) | 36(2)    | -17(2)  |
| C(32)  | 97(2)   | 68(2)   | 73(2)   | -1(1)  | 32(2)    | -5(2)   |
| C(33)  | 84(2)   | 67(2)   | 69(2)   | -4(1)  | 27(2)    | -3(2)   |
| C(34)  | 86(2)   | 72(2)   | 81(2)   | 1(1)   | 40(2)    | -3(2)   |
| C(35)  | 84(2)   | 71(2)   | 75(2)   | 0(1)   | 39(2)    | -3(2)   |
| C(36)  | 87(2)   | 70(2)   | 78(2)   | -6(1)  | 43(2)    | 1(2)    |
| C(37)  | 102(2)  | 74(2)   | 114(2)  | -13(2) | 58(2)    | -14(2)  |
| C(38)  | 76(2)   | 94(2)   | 95(2)   | -11(2) | 40(2)    | -19(2)  |
| C(39A) | 98(3)   | 79(2)   | 89(2)   | 1(2)   | 52(2)    | 5(2)    |
| C(40A) | 78(4)   | 73(3)   | 87(4)   | 14(3)  | 46(4)    | 0(3)    |
| C(41A) | 93(6)   | 84(4)   | 121(6)  | 7(4)   | 49(5)    | -9(4)   |
| C(42A) | 103(8)  | 140(13) | 100(6)  | 3(6)   | 31(5)    | -44(6)  |
| C(39B) | 98(3)   | 79(2)   | 89(2)   | 1(2)   | 52(2)    | 5(2)    |
| C(40B) | 107(10) | 106(8)  | 128(10) | 11(8)  | 53(8)    | -1(8)   |
| C(41B) | 126(11) | 95(7)   | 122(8)  | -1(6)  | 56(8)    | 11(7)   |
| C(42B) | 92(11)  | 119(14) | 191(19) | 7(10)  | 65(11)   | -47(10) |
| C(43A) | 130(6)  | 79(4)   | 98(4)   | -9(4)  | 68(5)    | 8(4)    |
| C(44A) | 232(10) | 90(4)   | 103(5)  | -4(4)  | 66(6)    | 19(5)   |
| C(45A) | 188(5)  | 67(2)   | 214(5)  | 14(2)  | 87(4)    | -9(2)   |
| C(46A) | 165(4)  | 171(4)  | 125(3)  | -9(3)  | 60(3)    | 26(3)   |
| C(43B) | 90(7)   | 73(8)   | 120(10) | -4(8)  | 11(8)    | 26(6)   |
| C(44B) | 218(16) | 78(8)   | 193(15) | 25(9)  | -140(12) | 2(8)    |
| C(45B) | 188(5)  | 67(2)   | 214(5)  | 14(2)  | 87(4)    | -9(2)   |
| C(46B) | 165(4)  | 171(4)  | 125(3)  | -9(3)  | 60(3)    | 26(3)   |
| C(47)  | 72(2)   | 71(2)   | 71(2)   | 1(1)   | 30(1)    | 4(1)    |
| C(48)  | 63(2)   | 72(2)   | 74(2)   | 1(1)   | 26(1)    | 1(1)    |
| C(49)  | 65(2)   | 67(2)   | 71(2)   | 7(1)   | 24(1)    | -1(1)   |
| C(50)  | 92(2)   | 69(2)   | 95(2)   | 6(1)   | 40(2)    | 7(2)    |
| C(51)  | 123(3)  | 76(2)   | 111(2)  | 5(2)   | 43(2)    | 17(2)   |
| C(52)  | 122(3)  | 73(2)   | 106(3)  | 12(2)  | 19(2)    | 2(2)    |
| C(53)  | 111(3)  | 96(3)   | 113(3)  | 34(2)  | 30(2)    | -25(2)  |
| C(54)  | 102(2)  | 94(2)   | 93(2)   | 11(2)  | 40(2)    | -9(2)   |
| N(2)   | 117(2)  | 65(1)   | 146(2)  | 6(1)   | 87(2)    | 8(2)    |

**Table 5. Hydrogen coordinates ( $\times 10^4$ ) and isotropic displacement parameters ( $\text{\AA}^2 \times 10^3$ )**

|        | x     | y    | z    | U(eq) |
|--------|-------|------|------|-------|
| H(3)   | 3074  | 5599 | 5996 | 86    |
| H(6)   | 291   | 4526 | 6025 | 86    |
| H(7)   | 235   | 6328 | 6287 | 86    |
| H(8)   | -573  | 5105 | 6462 | 89    |
| H(10)  | -2040 | 5073 | 6686 | 94    |
| H(11)  | -3379 | 5561 | 6826 | 94    |
| H(13)  | -2371 | 7414 | 6549 | 115   |
| H(14)  | -1037 | 6922 | 6416 | 102   |
| H(15A) | -4758 | 6036 | 6504 | 124   |
| H(15B) | -5250 | 6720 | 6664 | 124   |
| H(16A) | -3632 | 6007 | 8054 | 146   |
| H(16B) | -4169 | 6668 | 8205 | 146   |
| H(17A) | -5047 | 5381 | 7724 | 171   |
| H(17B) | -5612 | 6043 | 7840 | 171   |
| H(18A) | -3966 | 5382 | 9216 | 227   |
| H(18B) | -5090 | 5417 | 9122 | 227   |
| H(18C) | -4414 | 6092 | 9354 | 227   |
| H(19A) | -3910 | 7685 | 7602 | 124   |
| H(19B) | -2943 | 7745 | 7396 | 124   |
| H(20A) | -4957 | 7884 | 6073 | 156   |
| H(20B) | -3973 | 7993 | 5913 | 156   |
| H(21A) | -4794 | 9079 | 6177 | 214   |
| H(21B) | -4230 | 8870 | 7207 | 214   |
| H(22A) | -2758 | 8986 | 7248 | 342   |
| H(22B) | -3356 | 9564 | 6540 | 342   |
| H(22C) | -3153 | 8838 | 6211 | 342   |
| H(19C) | -5000 | 7497 | 6061 | 79    |
| H(19D) | -4005 | 7634 | 5915 | 79    |
| H(20C) | -3131 | 7935 | 7487 | 104   |
| H(20D) | -4187 | 7885 | 7542 | 104   |
| H(21C) | -4731 | 8739 | 6236 | 102   |
| H(21D) | -4234 | 9015 | 7236 | 102   |
| H(22D) | -2662 | 8816 | 7099 | 116   |
| H(22E) | -3279 | 9508 | 6737 | 116   |
| H(22F) | -3380 | 8900 | 6065 | 116   |
| H(26)  | 753   | 8076 | 5822 | 96    |
| H(27)  | 984   | 9245 | 5983 | 111   |
| H(28)  | 2588  | 9698 | 6701 | 105   |
| H(29)  | 3965  | 8977 | 7250 | 107   |
| H(30)  | 3744  | 7803 | 7080 | 96    |
| H(31)  | 3042  | 3764 | 5750 | 100   |
| H(32)  | 4152  | 4890 | 5808 | 97    |
| H(34)  | 5687  | 4679 | 5638 | 94    |
| H(35)  | 6920  | 3973 | 5619 | 90    |
| H(37)  | 5403  | 2335 | 5875 | 111   |
| H(38)  | 4152  | 3058 | 5848 | 104   |
| H(39A) | 7779  | 3321 | 5336 | 102   |
| H(39B) | 8276  | 2570 | 5518 | 102   |
| H(40A) | 8249  | 3399 | 6965 | 91    |
| H(40B) | 8882  | 2709 | 7095 | 91    |
| H(41A) | 9835  | 3265 | 6441 | 118   |
| H(41B) | 9245  | 3954 | 6403 | 118   |
| H(42A) | 10012 | 4038 | 7925 | 179   |
| H(42B) | 10855 | 3951 | 7574 | 179   |
| H(42C) | 10547 | 3315 | 8004 | 179   |
| H(39C) | 7666  | 3160 | 5156 | 102   |

|        |       |      |      |     |
|--------|-------|------|------|-----|
| H(39D) | 8277  | 2507 | 5636 | 102 |
| H(40C) | 9202  | 3479 | 5962 | 135 |
| H(40D) | 8555  | 3787 | 6434 | 135 |
| H(41C) | 9801  | 2649 | 6976 | 136 |
| H(41D) | 9073  | 2871 | 7411 | 136 |
| H(42D) | 10733 | 3648 | 7476 | 199 |
| H(42E) | 10661 | 3283 | 8302 | 199 |
| H(42F) | 9965  | 3927 | 7842 | 199 |
| H(43A) | 7945  | 1908 | 6680 | 114 |
| H(43B) | 6794  | 1900 | 6523 | 114 |
| H(44A) | 7402  | 1542 | 5222 | 173 |
| H(44B) | 6304  | 1446 | 5181 | 173 |
| H(45A) | 7387  | 779  | 6655 | 188 |
| H(45B) | 6826  | 402  | 5723 | 188 |
| H(46A) | 8351  | 546  | 5575 | 232 |
| H(46B) | 8349  | -9   | 6274 | 232 |
| H(46C) | 8851  | 722  | 6610 | 232 |
| H(43C) | 6208  | 1819 | 5535 | 128 |
| H(43D) | 6942  | 1805 | 5062 | 128 |
| H(44C) | 7481  | 1600 | 6830 | 293 |
| H(44D) | 8243  | 1617 | 6382 | 293 |
| H(45C) | 7149  | 508  | 6475 | 188 |
| H(45D) | 6823  | 674  | 5445 | 188 |
| H(46D) | 8331  | 517  | 5563 | 232 |
| H(46E) | 8369  | -1   | 6315 | 232 |
| H(46F) | 8850  | 743  | 6581 | 232 |
| H(50)  | 2099  | 2248 | 4921 | 103 |
| H(51)  | 2039  | 1075 | 4749 | 128 |
| H(52)  | 1250  | 412  | 5384 | 133 |
| H(53)  | 549   | 907  | 6245 | 136 |
| H(54)  | 604   | 2097 | 6425 | 117 |

**Table 6. Torsion angles [°]**

|                         |           |                             |           |
|-------------------------|-----------|-----------------------------|-----------|
| C(6)-C(1)-C(2)-C(3)     | -1.0(3)   | C(11)-C(12)-C(13)-C(14)     | 0.3(4)    |
| C(7)-C(1)-C(2)-C(3)     | 179.9(2)  | C(12)-C(13)-C(14)-C(9)      | 0.2(4)    |
| C(6)-C(1)-C(2)-C(23)    | 179.8(2)  | C(10)-C(9)-C(14)-C(13)      | -0.5(4)   |
| C(7)-C(1)-C(2)-C(23)    | 0.7(3)    | C(8)-C(9)-C(14)-C(13)       | 178.5(2)  |
| C(1)-C(2)-C(3)-C(4)     | -0.4(3)   | N(1A)-C(15)-C(16)-C(17)     | -176.4(3) |
| C(23)-C(2)-C(3)-C(4)    | 178.8(2)  | C(15)-C(16)-C(17)-C(18)     | -178.0(3) |
| C(2)-C(3)-C(4)-C(5)     | 0.7(3)    | C(13)-C(12)-N(1A)-C(15)     | 178.4(3)  |
| C(2)-C(3)-C(4)-C(31)    | -177.1(2) | C(11)-C(12)-N(1A)-C(15)     | -0.7(4)   |
| C(3)-C(4)-C(5)-C(6)     | 0.3(3)    | C(13)-C(12)-N(1A)-C(19A)    | -26.9(5)  |
| C(31)-C(4)-C(5)-C(6)    | 178.2(2)  | C(11)-C(12)-N(1A)-C(19A)    | 153.9(4)  |
| C(3)-C(4)-C(5)-C(47)    | -179.2(2) | C(16)-C(15)-N(1A)-C(12)     | 81.7(4)   |
| C(31)-C(4)-C(5)-C(47)   | -1.3(3)   | C(16)-C(15)-N(1A)-C(19A)    | -72.3(4)  |
| C(4)-C(5)-C(6)-C(1)     | -1.7(3)   | C(12)-N(1A)-C(19A)-C(20A)   | 106.8(6)  |
| C(47)-C(5)-C(6)-C(1)    | 177.8(2)  | C(15)-N(1A)-C(19A)-C(20A)   | -97.1(6)  |
| C(2)-C(1)-C(6)-C(5)     | 2.1(3)    | N(1A)-C(19A)-C(20A)-C(21A)  | 175.8(8)  |
| C(7)-C(1)-C(6)-C(5)     | -178.8(2) | C(19A)-C(20A)-C(21A)-C(22A) | 82.7(16)  |
| C(6)-C(1)-C(7)-C(8)     | 9.4(4)    | C(19B)-C(20B)-C(21B)-C(22B) | -91.3(14) |
| C(2)-C(1)-C(7)-C(8)     | -171.5(2) | C(3)-C(2)-C(23)-C(24)       | 58(15)    |
| C(1)-C(7)-C(8)-C(9)     | -177.0(2) | C(1)-C(2)-C(23)-C(24)       | -123(15)  |
| C(7)-C(8)-C(9)-C(10)    | 179.4(2)  | C(2)-C(23)-C(24)-C(25)      | 16(33)    |
| C(7)-C(8)-C(9)-C(14)    | 0.4(4)    | C(23)-C(24)-C(25)-C(26)     | 73(22)    |
| C(14)-C(9)-C(10)-C(11)  | 0.4(4)    | C(23)-C(24)-C(25)-C(30)     | -107(22)  |
| C(8)-C(9)-C(10)-C(11)   | -178.7(2) | C(30)-C(25)-C(26)-C(27)     | -0.5(4)   |
| C(9)-C(10)-C(11)-C(12)  | 0.1(4)    | C(24)-C(25)-C(26)-C(27)     | 179.2(2)  |
| C(10)-C(11)-C(12)-N(1A) | 178.8(3)  | C(25)-C(26)-C(27)-C(28)     | -0.1(4)   |
| C(10)-C(11)-C(12)-C(13) | -0.4(4)   | C(26)-C(27)-C(28)-C(29)     | 0.3(4)    |
| N(1A)-C(12)-C(13)-C(14) | -178.9(3) | C(27)-C(28)-C(29)-C(30)     | 0.0(4)    |

|                             |            |                           |            |
|-----------------------------|------------|---------------------------|------------|
| C(28)-C(29)-C(30)-C(25)     | -0.6(4)    | C(47)-C(48)-C(49)-C(50)   | -12(6)     |
| C(26)-C(25)-C(30)-C(29)     | 0.8(4)     | C(47)-C(48)-C(49)-C(54)   | 167(5)     |
| C(24)-C(25)-C(30)-C(29)     | -178.9(2)  | C(54)-C(49)-C(50)-C(51)   | 1.7(4)     |
| C(3)-C(4)-C(31)-C(32)       | -1.0(4)    | C(48)-C(49)-C(50)-C(51)   | -179.8(2)  |
| C(5)-C(4)-C(31)-C(32)       | -178.8(3)  | C(49)-C(50)-C(51)-C(52)   | -0.3(5)    |
| C(4)-C(31)-C(32)-C(33)      | 175.7(2)   | C(50)-C(51)-C(52)-C(53)   | -1.2(5)    |
| C(31)-C(32)-C(33)-C(34)     | 176.0(3)   | C(51)-C(52)-C(53)-C(54)   | 1.2(5)     |
| C(31)-C(32)-C(33)-C(38)     | -6.4(4)    | C(50)-C(49)-C(54)-C(53)   | -1.7(4)    |
| C(38)-C(33)-C(34)-C(35)     | -0.3(4)    | C(48)-C(49)-C(54)-C(53)   | 179.8(2)   |
| C(32)-C(33)-C(34)-C(35)     | 177.4(2)   | C(52)-C(53)-C(54)-C(49)   | 0.3(5)     |
| C(33)-C(34)-C(35)-C(36)     | -1.5(4)    | C(35)-C(36)-N(2)-C(39A)   | 1.1(4)     |
| C(34)-C(35)-C(36)-N(2)      | -178.5(2)  | C(37)-C(36)-N(2)-C(39A)   | -179.5(3)  |
| C(34)-C(35)-C(36)-C(37)     | 2.1(4)     | C(35)-C(36)-N(2)-C(43B)   | -162.5(7)  |
| N(2)-C(36)-C(37)-C(38)      | 179.5(3)   | C(37)-C(36)-N(2)-C(43B)   | 16.9(8)    |
| C(35)-C(36)-C(37)-C(38)     | -1.1(4)    | C(35)-C(36)-N(2)-C(43A)   | 156.1(4)   |
| C(36)-C(37)-C(38)-C(33)     | -0.6(4)    | C(37)-C(36)-N(2)-C(43A)   | -24.6(5)   |
| C(34)-C(33)-C(38)-C(37)     | 1.4(4)     | C(40A)-C(39A)-N(2)-C(36)  | 83.5(4)    |
| C(32)-C(33)-C(38)-C(37)     | -176.3(2)  | C(40A)-C(39A)-N(2)-C(43B) | -112.5(7)  |
| N(2)-C(39A)-C(40A)-C(41A)   | -170.1(5)  | C(40A)-C(39A)-N(2)-C(43A) | -72.8(4)   |
| C(39A)-C(40A)-C(41A)-C(42A) | -175.1(11) | C(44B)-C(43B)-N(2)-C(36)  | -124.0(16) |
| N(2)-C(43A)-C(44A)-C(45A)   | 171.2(5)   | C(44B)-C(43B)-N(2)-C(39A) | 72(2)      |
| C(43A)-C(44A)-C(45A)-C(46A) | -100.6(7)  | C(44B)-C(43B)-N(2)-C(43A) | -23.2(13)  |
| C(6)-C(5)-C(47)-C(48)       | -140(6)    | C(44A)-C(43A)-N(2)-C(36)  | 114.2(6)   |
| C(4)-C(5)-C(47)-C(48)       | 40(6)      | C(44A)-C(43A)-N(2)-C(39A) | -89.1(8)   |
| C(5)-C(47)-C(48)-C(49)      | -58(10)    | C(44A)-C(43A)-N(2)-C(43B) | 13.6(10)   |

## X-Ray Structure Determination, C<sub>56</sub>H<sub>58</sub>F<sub>6</sub>N<sub>2</sub>

C<sub>56</sub>H<sub>58</sub>F<sub>6</sub>N<sub>2</sub> crystallizes in the form of brilliant orange plates. Evaluation of several samples showed broad diffraction peaks and weak scattering > 2θ ~ 40°. The crystal judged to be the best of these was mounted onto the end of a thin glass fiber using inert oil. X-ray intensity data were measured at 150.0(2) K on a Bruker SMART APEX CCD-based diffractometer (Mo Kα radiation, λ = 0.71073 Å).<sup>1</sup> The raw data frames were integrated into reflection intensity files with SAINT+,<sup>1</sup> which also applied corrections for Lorentz and polarization effects. The final unit cell parameters are based on the least-squares refinement of 5134 reflections from the data set with I > 5σ(I). Analysis of the data showed negligible crystal decay during data collection. No correction for absorption was applied.

Systematic absences in the intensity data uniquely determined the monoclinic space group P2<sub>1</sub>/n. The structure was solved by a combination of direct methods and difference Fourier syntheses, and refined by full-matrix least-squares against F<sup>2</sup>, using SHELXTL.<sup>2</sup> All atoms reside on positions of general crystallographic symmetry. Severe positional disorder of both butyl groups attached to N2 was observed. A disorder model consisting of two distinct conformations was employed. Occupation factors were adjusted manually and then fixed at values yielding reasonable displacement parameters. A total of 14 geometric restraints were used to maintain a chemically reasonable geometry for these groups. The behavior of the displacement parameters as well as the presence of several diffuse difference peaks in this region indicate more butyl group conformations exist. One atom (C45A) of the minor disorder component was refined isotropically; all other non-hydrogen atoms were refined with anisotropic displacement parameters. Hydrogen atoms were placed in idealized positions and included as riding atoms. The relatively high final residuals reflect the poor crystal quality and side chain disorder.

(1) SMART Version 5.625 and SAINT+ Version 6.02a. Bruker Analytical X-ray Systems, Inc., Madison, Wisconsin, USA, 1998.

(2) Sheldrick, G. M. SHELXTL Version 5.1; Bruker Analytical X-ray Systems, Inc., Madison, Wisconsin, USA, 1997.



**Table 1. Crystal data and structure refinement**

|                                   |                                                           |                                                                                 |
|-----------------------------------|-----------------------------------------------------------|---------------------------------------------------------------------------------|
| Identification code               | dba1bm                                                    |                                                                                 |
| Empirical formula                 | C56 H58 F6 N2                                             |                                                                                 |
| Formula weight                    | 873.04                                                    |                                                                                 |
| Temperature                       | 150.0(2) K                                                |                                                                                 |
| Wavelength                        | 0.71073 Å                                                 |                                                                                 |
| Crystal system                    | Monoclinic                                                |                                                                                 |
| Space group                       | P2 <sub>1</sub> /n                                        |                                                                                 |
| Unit cell dimensions              | a = 13.8368(7) Å<br>b = 16.9399(8) Å<br>c = 20.4197(10) Å | $\alpha = 90^\circ$ .<br>$\beta = 97.8490(10)^\circ$ .<br>$\gamma = 90^\circ$ . |
| Volume                            | 4741.4(4) Å <sup>3</sup>                                  |                                                                                 |
| Z                                 | 4                                                         |                                                                                 |
| Density (calculated)              | 1.223 Mg/m <sup>3</sup>                                   |                                                                                 |
| Absorption coefficient            | 0.087 mm <sup>-1</sup>                                    |                                                                                 |
| F(000)                            | 1848                                                      |                                                                                 |
| Crystal size                      | 0.38 x 0.28 x 0.10 mm <sup>3</sup>                        |                                                                                 |
| Theta range for data collection   | 1.57 to 20.81°                                            |                                                                                 |
| Index ranges                      | -13<=h<=13, -16<=k<=16, -20<=l<=20                        |                                                                                 |
| Reflections collected             | 23049                                                     |                                                                                 |
| Independent reflections           | 4958 [R(int) = 0.0603]                                    |                                                                                 |
| Completeness to theta = 20.81°    | 100.0 %                                                   |                                                                                 |
| Absorption correction             | None                                                      |                                                                                 |
| Refinement method                 | Full-matrix least-squares on F <sup>2</sup>               |                                                                                 |
| Data / restraints / parameters    | 4958 / 14 / 608                                           |                                                                                 |
| Goodness-of-fit on F <sup>2</sup> | 0.971                                                     |                                                                                 |
| Final R indices [I>2sigma(I)]     | R1 = 0.0596, wR2 = 0.1407                                 |                                                                                 |
| R indices (all data)              | R1 = 0.1022, wR2 = 0.1581                                 |                                                                                 |
| Largest diff. peak and hole       | 0.209 and -0.157 e.Å <sup>-3</sup>                        |                                                                                 |

**Table 2. Atomic coordinates (x 10<sup>4</sup>) and equivalent isotropic displacement parameters (Å<sup>2</sup> x 10<sup>3</sup>). U(eq) is defined as one third of the trace of the orthogonalized U<sup>ij</sup> tensor.**

|       | x        | y       | z       | U(eq)  |
|-------|----------|---------|---------|--------|
| C(1)  | 2843(3)  | 1342(3) | 2020(3) | 77(1)  |
| C(2)  | 2453(3)  | 1217(3) | 1352(3) | 74(1)  |
| C(3)  | 3038(3)  | 1271(2) | 863(3)  | 75(1)  |
| C(4)  | 4025(3)  | 1446(2) | 987(3)  | 73(1)  |
| C(5)  | 4414(3)  | 1595(2) | 1649(3) | 73(1)  |
| C(6)  | 3836(3)  | 1544(2) | 2142(3) | 73(1)  |
| C(7)  | 2237(4)  | 1286(3) | 2551(3) | 85(2)  |
| C(8)  | 2535(3)  | 1336(3) | 3201(3) | 88(2)  |
| C(9)  | 1977(4)  | 1288(3) | 3745(3) | 80(2)  |
| C(10) | 2455(4)  | 1351(3) | 4383(3) | 85(2)  |
| C(11) | 1989(3)  | 1316(3) | 4931(3) | 85(2)  |
| C(12) | 959(4)   | 1224(3) | 4867(3) | 74(1)  |
| C(13) | 469(4)   | 1190(3) | 4223(3) | 80(2)  |
| C(14) | 961(4)   | 1221(3) | 3685(3) | 80(2)  |
| C(15) | 984(3)   | 1257(3) | 6075(2) | 84(2)  |
| C(16) | 1458(3)  | 507(3)  | 6365(2) | 80(1)  |
| C(17) | 2071(3)  | 645(3)  | 7033(2) | 92(2)  |
| C(18) | 2464(4)  | -109(3) | 7356(3) | 117(2) |
| C(19) | -523(3)  | 884(3)  | 5353(2) | 85(2)  |
| C(20) | -1274(3) | 1512(3) | 5338(3) | 97(2)  |
| C(21) | -2300(4) | 1137(3) | 5305(3) | 117(2) |
| C(22) | -3045(4) | 1706(4) | 5376(3) | 139(2) |
| C(23) | 1420(3)  | 1046(3) | 1159(2) | 77(1)  |

|        |          |          |           |         |
|--------|----------|----------|-----------|---------|
| C(24)  | 600(3)   | 915(3)   | 952(2)    | 80(2)   |
| C(25)  | -399(3)  | 791(3)   | 676(2)    | 72(1)   |
| C(26)  | -955(3)  | 220(3)   | 931(2)    | 83(2)   |
| C(27)  | -1930(3) | 105(3)   | 682(2)    | 79(2)   |
| C(28)  | -2352(3) | 548(3)   | 172(3)    | 88(2)   |
| C(29)  | -1816(3) | 1120(3)  | -96(2)    | 89(2)   |
| C(30)  | -854(3)  | 1242(3)  | 146(3)    | 74(1)   |
| C(31)  | -304(4)  | 1878(4)  | -133(3)   | 95(2)   |
| C(32)  | 4636(3)  | 1477(3)  | 454(3)    | 76(2)   |
| C(33)  | 4458(3)  | 1070(3)  | -106(3)   | 73(1)   |
| C(34)  | 4968(3)  | 1077(3)  | -676(3)   | 70(1)   |
| C(35)  | 4771(3)  | 503(3)   | -1164(3)  | 76(1)   |
| C(36)  | 5209(4)  | 485(3)   | -1713(3)  | 87(2)   |
| C(37)  | 5919(3)  | 1053(3)  | -1810(4)  | 82(2)   |
| C(38)  | 6121(3)  | 1632(3)  | -1330(3)  | 83(2)   |
| C(39)  | 5666(3)  | 1639(3)  | -788(3)   | 75(2)   |
| C(40A) | 6145(4)  | 489(4)   | -2860(4)  | 121(2)  |
| C(41A) | 5259(6)  | 697(3)   | -3326(3)  | 121(2)  |
| C(42A) | 5010(5)  | 80(6)    | -3837(4)  | 179(3)  |
| C(43A) | 4211(6)  | 292(6)   | -4307(4)  | 135(3)  |
| C(40B) | 6145(4)  | 489(4)   | -2860(4)  | 121(2)  |
| C(41B) | 5259(6)  | 697(3)   | -3326(3)  | 121(2)  |
| C(42B) | 5010(5)  | 80(6)    | -3837(4)  | 179(3)  |
| C(43B) | 4394(18) | -565(13) | -4037(14) | 154(12) |
| C(44A) | 7094(5)  | 1644(3)  | -2486(4)  | 139(2)  |
| C(45A) | 7895(17) | 1324(19) | -2831(12) | 292(16) |
| C(46A) | 8531(11) | 872(12)  | -2343(17) | 188(15) |
| C(47A) | 9515(15) | 923(19)  | -2529(17) | 166(5)  |
| C(44B) | 7094(5)  | 1644(3)  | -2486(4)  | 139(2)  |
| C(45B) | 8102(5)  | 1596(6)  | -2087(6)  | 125(4)  |
| C(46B) | 8712(16) | 934(12)  | -2023(8)  | 267(16) |
| C(47B) | 9136(10) | 691(12)  | -2609(10) | 166(5)  |
| C(48)  | 5433(3)  | 1779(2)  | 1834(2)   | 73(1)   |
| C(49)  | 6263(3)  | 1931(2)  | 2004(2)   | 72(1)   |
| C(50)  | 7287(3)  | 2127(2)  | 2177(2)   | 65(1)   |
| C(51)  | 7904(3)  | 2045(2)  | 1705(2)   | 72(1)   |
| C(52)  | 8888(3)  | 2226(3)  | 1841(3)   | 79(1)   |
| C(53)  | 9253(3)  | 2479(3)  | 2458(3)   | 80(2)   |
| C(54)  | 8659(3)  | 2571(3)  | 2942(2)   | 76(1)   |
| C(55)  | 7675(3)  | 2394(3)  | 2808(2)   | 68(1)   |
| C(56)  | 7055(4)  | 2514(4)  | 3330(3)   | 91(2)   |
| F(1)   | -45(2)   | 2463(2)  | 293(2)    | 131(1)  |
| F(2)   | -801(2)  | 2216(2)  | -675(2)   | 147(1)  |
| F(3)   | 529(2)   | 1638(2)  | -341(1)   | 108(1)  |
| F(4)   | 7511(2)  | 2821(2)  | 3880(2)   | 131(1)  |
| F(5)   | 6641(2)  | 1842(2)  | 3503(2)   | 133(1)  |
| F(6)   | 6283(2)  | 2980(2)  | 3158(2)   | 128(1)  |
| N(1)   | 477(3)   | 1177(2)  | 5406(2)   | 83(1)   |
| N(2)   | 6383(3)  | 1063(3)  | -2363(3)  | 112(2)  |

---

**Table 3. Bond lengths [Å] and angles [°]**

|               |           |                   |           |                      |           |
|---------------|-----------|-------------------|-----------|----------------------|-----------|
| C(1)-C(6)     | 1.405(6)  | C(46A)-C(47A)     | 1.465(14) | C(30)-C(29)-C(28)    | 120.8(5)  |
| C(1)-C(2)     | 1.413(6)  | C(45B)-C(46B)     | 1.398(13) | C(29)-C(30)-C(25)    | 120.5(5)  |
| C(1)-C(7)     | 1.462(6)  | C(46B)-C(47B)     | 1.461(13) | C(29)-C(30)-C(31)    | 119.8(5)  |
| C(2)-C(3)     | 1.372(6)  | C(48)-C(49)       | 1.182(5)  | C(25)-C(30)-C(31)    | 119.7(4)  |
| C(2)-C(23)    | 1.458(6)  | C(49)-C(50)       | 1.451(6)  | F(1)-C(31)-F(3)      | 105.4(4)  |
| C(3)-C(4)     | 1.387(6)  | C(50)-C(51)       | 1.378(6)  | F(1)-C(31)-F(2)      | 106.4(5)  |
| C(4)-C(5)     | 1.409(6)  | C(50)-C(55)       | 1.402(5)  | F(3)-C(31)-F(2)      | 103.4(5)  |
| C(4)-C(32)    | 1.467(6)  | C(51)-C(52)       | 1.386(6)  | F(1)-C(31)-C(30)     | 113.4(5)  |
| C(5)-C(6)     | 1.372(6)  | C(52)-C(53)       | 1.362(6)  | F(3)-C(31)-C(30)     | 114.1(5)  |
| C(5)-C(48)    | 1.442(6)  | C(53)-C(54)       | 1.376(6)  | F(2)-C(31)-C(30)     | 113.2(5)  |
| C(7)-C(8)     | 1.338(6)  | C(54)-C(55)       | 1.385(5)  | C(33)-C(32)-C(4)     | 124.2(5)  |
| C(8)-C(9)     | 1.438(7)  | C(55)-C(56)       | 1.471(7)  | C(32)-C(33)-C(34)    | 129.5(5)  |
| C(9)-C(10)    | 1.384(6)  | C(56)-F(4)        | 1.318(5)  | C(35)-C(34)-C(39)    | 115.5(5)  |
| C(9)-C(14)    | 1.398(6)  | C(56)-F(6)        | 1.336(6)  | C(35)-C(34)-C(33)    | 120.1(5)  |
| C(10)-C(11)   | 1.367(6)  | C(56)-F(5)        | 1.342(6)  | C(39)-C(34)-C(33)    | 124.3(6)  |
| C(11)-C(12)   | 1.422(6)  | C(6)-C(1)-C(2)    | 116.4(5)  | C(36)-C(35)-C(34)    | 123.0(5)  |
| C(12)-N(1)    | 1.364(6)  | C(6)-C(1)-C(7)    | 122.0(5)  | C(35)-C(36)-C(37)    | 120.3(6)  |
| C(12)-C(13)   | 1.395(6)  | C(2)-C(1)-C(7)    | 121.6(5)  | N(2)-C(37)-C(38)     | 120.0(5)  |
| C(13)-C(14)   | 1.371(6)  | C(3)-C(2)-C(1)    | 120.4(4)  | N(2)-C(37)-C(36)     | 122.6(6)  |
| C(15)-N(1)    | 1.455(5)  | C(3)-C(2)-C(23)   | 118.0(5)  | C(38)-C(37)-C(36)    | 117.4(6)  |
| C(15)-C(16)   | 1.513(6)  | C(1)-C(2)-C(23)   | 121.5(5)  | C(39)-C(38)-C(37)    | 121.0(5)  |
| C(16)-C(17)   | 1.523(5)  | C(2)-C(3)-C(4)    | 123.2(5)  | C(38)-C(39)-C(34)    | 122.7(5)  |
| C(17)-C(18)   | 1.505(6)  | C(3)-C(4)-C(5)    | 116.8(5)  | N(2)-C(40A)-C(41A)   | 112.8(5)  |
| C(19)-N(1)    | 1.461(5)  | C(3)-C(4)-C(32)   | 121.7(5)  | C(42A)-C(41A)-C(40A) | 112.0(7)  |
| C(19)-C(20)   | 1.485(6)  | C(5)-C(4)-C(32)   | 121.5(4)  | C(43A)-C(42A)-C(41A) | 112.7(8)  |
| C(20)-C(21)   | 1.549(6)  | C(6)-C(5)-C(4)    | 120.6(4)  | N(2)-C(44A)-C(45A)   | 113.8(14) |
| C(21)-C(22)   | 1.432(7)  | C(6)-C(5)-C(48)   | 117.9(5)  | C(46A)-C(45A)-C(44A) | 106.7(16) |
| C(23)-C(24)   | 1.177(5)  | C(4)-C(5)-C(48)   | 121.5(5)  | C(45A)-C(46A)-C(47A) | 107(2)    |
| C(24)-C(25)   | 1.435(6)  | C(5)-C(6)-C(1)    | 122.6(5)  | C(45B)-C(46B)-C(47B) | 117.1(16) |
| C(25)-C(26)   | 1.382(6)  | C(8)-C(7)-C(1)    | 127.0(5)  | C(49)-C(48)-C(5)     | 178.1(6)  |
| C(25)-C(30)   | 1.402(6)  | C(7)-C(8)-C(9)    | 129.5(5)  | C(48)-C(49)-C(50)    | 177.0(5)  |
| C(26)-C(27)   | 1.389(5)  | C(10)-C(9)-C(14)  | 115.7(6)  | C(51)-C(50)-C(55)    | 118.7(4)  |
| C(27)-C(28)   | 1.349(6)  | C(10)-C(9)-C(8)   | 119.0(5)  | C(51)-C(50)-C(49)    | 118.9(4)  |
| C(28)-C(29)   | 1.379(6)  | C(14)-C(9)-C(8)   | 125.2(5)  | C(55)-C(50)-C(49)    | 122.4(5)  |
| C(29)-C(30)   | 1.371(5)  | C(11)-C(10)-C(9)  | 123.3(5)  | C(50)-C(51)-C(52)    | 121.5(4)  |
| C(30)-C(31)   | 1.477(7)  | C(10)-C(11)-C(12) | 120.6(5)  | C(53)-C(52)-C(51)    | 119.0(5)  |
| C(31)-F(1)    | 1.334(6)  | N(1)-C(12)-C(13)  | 122.0(5)  | C(52)-C(53)-C(54)    | 121.1(4)  |
| C(31)-F(3)    | 1.345(5)  | N(1)-C(12)-C(11)  | 121.7(5)  | C(53)-C(54)-C(55)    | 120.1(5)  |
| C(31)-F(2)    | 1.348(5)  | C(13)-C(12)-C(11) | 116.3(5)  | C(54)-C(55)-C(50)    | 119.6(5)  |
| C(32)-C(33)   | 1.328(6)  | C(14)-C(13)-C(12) | 121.5(5)  | C(54)-C(55)-C(56)    | 118.9(5)  |
| C(33)-C(34)   | 1.441(6)  | C(13)-C(14)-C(9)  | 122.5(5)  | C(50)-C(55)-C(56)    | 121.5(4)  |
| C(34)-C(35)   | 1.393(6)  | N(1)-C(15)-C(16)  | 114.6(4)  | F(4)-C(56)-F(6)      | 105.3(5)  |
| C(34)-C(39)   | 1.398(6)  | C(15)-C(16)-C(17) | 112.3(4)  | F(4)-C(56)-F(5)      | 106.4(5)  |
| C(35)-C(36)   | 1.346(6)  | C(18)-C(17)-C(16) | 112.7(4)  | F(6)-C(56)-F(5)      | 102.5(5)  |
| C(36)-C(37)   | 1.408(6)  | N(1)-C(19)-C(20)  | 114.3(4)  | F(4)-C(56)-C(55)     | 114.4(5)  |
| C(37)-N(2)    | 1.374(6)  | C(19)-C(20)-C(21) | 110.0(4)  | F(6)-C(56)-C(55)     | 114.5(5)  |
| C(37)-C(38)   | 1.388(7)  | C(22)-C(21)-C(20) | 112.8(5)  | F(5)-C(56)-C(55)     | 112.6(5)  |
| C(38)-C(39)   | 1.345(6)  | C(24)-C(23)-C(2)  | 174.7(5)  | C(12)-N(1)-C(15)     | 121.8(4)  |
| C(40A)-N(2)   | 1.412(7)  | C(23)-C(24)-C(25) | 177.0(5)  | C(12)-N(1)-C(19)     | 121.5(4)  |
| C(40A)-C(41A) | 1.488(7)  | C(26)-C(25)-C(30) | 117.3(4)  | C(15)-N(1)-C(19)     | 115.6(4)  |
| C(41A)-C(42A) | 1.484(9)  | C(26)-C(25)-C(24) | 120.7(4)  | C(37)-N(2)-C(40A)    | 119.5(5)  |
| C(42A)-C(43A) | 1.407(8)  | C(30)-C(25)-C(24) | 122.0(5)  | C(37)-N(2)-C(44A)    | 124.1(6)  |
| C(44A)-N(2)   | 1.436(5)  | C(25)-C(26)-C(27) | 121.5(4)  | C(40A)-N(2)-C(44A)   | 116.4(6)  |
| C(44A)-C(45A) | 1.494(14) | C(28)-C(27)-C(26) | 120.1(5)  |                      |           |
| C(45A)-C(46A) | 1.453(15) | C(27)-C(28)-C(29) | 119.8(4)  |                      |           |

Symmetry transformations used to generate equivalent atoms:

**Table 4. Anisotropic displacement parameters ( $\text{\AA}^2 \times 10^{-3}$ ). The anisotropic displacement factor exponent takes the form:  $-2\pi^2 [ h^2 a^{*2} U^{11} + \dots + 2 h k a^* b^* U^{12} ]$**

|        | U <sup>11</sup> | U <sup>22</sup> | U <sup>33</sup> | U <sup>23</sup> | U <sup>13</sup> | U <sup>12</sup> |
|--------|-----------------|-----------------|-----------------|-----------------|-----------------|-----------------|
| C(1)   | 54(3)           | 61(3)           | 106(4)          | 14(3)           | -18(3)          | -2(2)           |
| C(2)   | 45(3)           | 64(3)           | 104(4)          | 11(3)           | -23(3)          | -1(2)           |
| C(3)   | 50(3)           | 63(3)           | 102(4)          | 8(3)            | -22(3)          | -3(2)           |
| C(4)   | 50(3)           | 57(3)           | 101(4)          | 17(3)           | -28(3)          | -8(2)           |
| C(5)   | 46(3)           | 53(3)           | 110(4)          | 15(3)           | -22(3)          | -10(2)          |
| C(6)   | 49(3)           | 64(3)           | 97(4)           | 15(3)           | -20(3)          | -9(2)           |
| C(7)   | 55(3)           | 73(3)           | 118(5)          | 15(3)           | -23(4)          | -3(3)           |
| C(8)   | 55(3)           | 83(4)           | 116(5)          | 22(4)           | -26(4)          | -11(3)          |
| C(9)   | 61(4)           | 67(3)           | 104(5)          | 22(3)           | -20(3)          | -10(3)          |
| C(10)  | 61(3)           | 81(4)           | 106(4)          | 29(3)           | -13(4)          | -13(3)          |
| C(11)  | 63(4)           | 68(3)           | 113(5)          | 20(3)           | -28(3)          | -11(3)          |
| C(12)  | 62(4)           | 56(3)           | 99(4)           | 6(3)            | -11(3)          | -2(2)           |
| C(13)  | 62(3)           | 58(3)           | 113(5)          | 11(3)           | -13(4)          | -6(3)           |
| C(14)  | 60(4)           | 64(3)           | 106(5)          | 13(3)           | -26(3)          | -9(3)           |
| C(15)  | 70(3)           | 67(3)           | 110(4)          | -10(3)          | -2(3)           | -5(3)           |
| C(16)  | 68(3)           | 68(3)           | 100(4)          | -11(3)          | -3(3)           | -6(3)           |
| C(17)  | 76(3)           | 91(4)           | 104(4)          | -8(3)           | -5(3)           | -9(3)           |
| C(18)  | 119(5)          | 109(5)          | 113(5)          | 16(4)           | -21(4)          | 3(4)            |
| C(19)  | 66(3)           | 69(3)           | 115(4)          | -4(3)           | -3(3)           | -6(3)           |
| C(20)  | 73(3)           | 81(4)           | 132(5)          | -9(3)           | -7(3)           | 4(3)            |
| C(21)  | 63(3)           | 95(4)           | 185(6)          | -14(4)          | -8(4)           | 4(3)            |
| C(22)  | 98(5)           | 117(5)          | 201(7)          | -7(5)           | 19(4)           | -1(4)           |
| C(23)  | 49(3)           | 66(3)           | 108(4)          | 2(3)            | -14(3)          | 1(2)            |
| C(24)  | 41(3)           | 78(3)           | 111(4)          | -12(3)          | -21(3)          | 0(2)            |
| C(25)  | 46(3)           | 61(3)           | 103(4)          | -5(3)           | -16(3)          | 4(3)            |
| C(26)  | 55(3)           | 80(4)           | 105(4)          | 6(3)            | -19(3)          | -1(3)           |
| C(27)  | 51(3)           | 68(3)           | 109(4)          | 10(3)           | -23(3)          | -12(2)          |
| C(28)  | 45(3)           | 73(3)           | 133(5)          | 6(3)            | -29(3)          | -11(3)          |
| C(29)  | 47(3)           | 91(4)           | 120(4)          | 14(3)           | -24(3)          | 3(3)            |
| C(30)  | 43(3)           | 57(3)           | 116(4)          | 2(3)            | -4(3)           | -10(2)          |
| C(31)  | 52(3)           | 104(5)          | 124(5)          | 8(4)            | -8(3)           | 19(4)           |
| C(32)  | 47(3)           | 63(3)           | 109(4)          | 16(3)           | -23(3)          | -6(2)           |
| C(33)  | 44(3)           | 61(3)           | 103(4)          | 18(3)           | -26(3)          | -9(2)           |
| C(34)  | 44(3)           | 54(3)           | 103(4)          | 29(3)           | -20(3)          | -7(3)           |
| C(35)  | 54(3)           | 53(3)           | 118(5)          | 20(4)           | -2(3)           | -11(3)          |
| C(36)  | 75(4)           | 59(3)           | 125(5)          | 15(3)           | 14(3)           | -6(3)           |
| C(37)  | 52(3)           | 59(4)           | 136(5)          | 38(4)           | 13(3)           | 5(3)            |
| C(38)  | 41(3)           | 54(4)           | 145(5)          | 25(4)           | -16(3)          | -5(3)           |
| C(39)  | 41(3)           | 64(3)           | 111(4)          | 23(3)           | -27(3)          | -6(3)           |
| C(40A) | 84(4)           | 104(5)          | 182(7)          | 35(5)           | 43(5)           | 13(4)           |
| C(41A) | 162(7)          | 88(4)           | 123(5)          | -29(4)          | 63(5)           | -37(5)          |
| C(42A) | 112(6)          | 205(9)          | 219(9)          | 6(8)            | 25(6)           | -5(6)           |
| C(43A) | 84(6)           | 182(10)         | 130(7)          | -12(7)          | -14(5)          | -11(6)          |
| C(40B) | 84(4)           | 104(5)          | 182(7)          | 35(5)           | 43(5)           | 13(4)           |
| C(41B) | 162(7)          | 88(4)           | 123(5)          | -29(4)          | 63(5)           | -37(5)          |
| C(42B) | 112(6)          | 205(9)          | 219(9)          | 6(8)            | 25(6)           | -5(6)           |
| C(43B) | 100(19)         | 140(30)         | 210(30)         | 20(20)          | -13(19)         | -80(20)         |
| C(44A) | 132(6)          | 88(4)           | 215(7)          | 16(5)           | 84(5)           | -30(4)          |
| C(46A) | 49(11)          | 101(18)         | 420(50)         | 40(20)          | 63(17)          | -36(13)         |
| C(47A) | 93(14)          | 223(16)         | 186(12)         | -41(11)         | 33(12)          | -101(11)        |
| C(44B) | 132(6)          | 88(4)           | 215(7)          | 16(5)           | 84(5)           | -30(4)          |
| C(45B) | 36(5)           | 109(8)          | 232(13)         | 73(9)           | 23(6)           | 20(5)           |
| C(46B) | 490(40)         | 190(20)         | 104(12)         | 14(12)          | -26(17)         | 60(20)          |
| C(47B) | 93(14)          | 223(16)         | 186(12)         | -41(11)         | 33(12)          | -101(11)        |
| C(48)  | 55(3)           | 59(3)           | 97(4)           | 16(3)           | -21(3)          | -9(2)           |
| C(49)  | 49(3)           | 65(3)           | 94(4)           | 19(3)           | -20(3)          | -11(2)          |

|       |        |        |        |        |        |        |
|-------|--------|--------|--------|--------|--------|--------|
| C(50) | 52(3)  | 56(3)  | 79(4)  | 9(3)   | -19(3) | -9(2)  |
| C(51) | 61(3)  | 68(3)  | 79(3)  | -14(3) | -13(3) | -6(3)  |
| C(52) | 59(3)  | 74(3)  | 100(4) | -18(3) | -4(3)  | -5(3)  |
| C(53) | 51(3)  | 72(3)  | 111(4) | -12(3) | -14(3) | -7(3)  |
| C(54) | 58(3)  | 75(3)  | 86(4)  | -5(3)  | -18(3) | -14(3) |
| C(55) | 54(3)  | 71(3)  | 74(4)  | 2(3)   | -9(3)  | -10(2) |
| C(56) | 85(4)  | 94(5)  | 88(4)  | 18(4)  | -3(4)  | -13(4) |
| F(1)  | 97(2)  | 85(2)  | 215(4) | -24(2) | 37(2)  | -26(2) |
| F(2)  | 85(2)  | 134(3) | 211(4) | 79(3)  | -19(2) | -5(2)  |
| F(3)  | 73(2)  | 121(2) | 127(2) | 8(2)   | 9(2)   | 5(2)   |
| F(4)  | 116(2) | 187(3) | 85(2)  | -33(2) | 1(2)   | -30(2) |
| F(5)  | 142(3) | 142(3) | 117(3) | 27(2)  | 21(2)  | -39(2) |
| F(6)  | 101(2) | 172(3) | 115(2) | 23(2)  | 29(2)  | 29(2)  |
| N(1)  | 62(3)  | 76(3)  | 108(4) | -9(3)  | -9(3)  | -6(2)  |
| N(2)  | 107(4) | 58(3)  | 179(6) | 7(4)   | 46(4)  | -7(3)  |

**Table 5. Hydrogen coordinates ( $\times 10^4$ ) and isotropic displacement parameters ( $\text{\AA}^2 \times 10^3$ )**

|        | x     | y    | z     | U(eq) |
|--------|-------|------|-------|-------|
| H(3)   | 2753  | 1184 | 419   | 90    |
| H(6)   | 4119  | 1650 | 2584  | 88    |
| H(7)   | 1559  | 1205 | 2421  | 102   |
| H(8)   | 3216  | 1416 | 3322  | 106   |
| H(10)  | 3142  | 1423 | 4444  | 102   |
| H(11)  | 2356  | 1353 | 5359  | 102   |
| H(13)  | -222  | 1144 | 4156  | 96    |
| H(14)  | 599   | 1196 | 3255  | 96    |
| H(15A) | 513   | 1444 | 6365  | 101   |
| H(15B) | 1494  | 1668 | 6076  | 101   |
| H(16A) | 1877  | 286  | 6054  | 96    |
| H(16B) | 944   | 114  | 6417  | 96    |
| H(17A) | 2624  | 996  | 6972  | 110   |
| H(17B) | 1668  | 917  | 7329  | 110   |
| H(18A) | 1920  | -455 | 7426  | 175   |
| H(18B) | 2851  | 12   | 7783  | 175   |
| H(18C) | 2877  | -375 | 7071  | 175   |
| H(19A) | -578  | 531  | 5732  | 102   |
| H(19B) | -661  | 564  | 4945  | 102   |
| H(20A) | -1250 | 1855 | 4947  | 116   |
| H(20B) | -1139 | 1843 | 5739  | 116   |
| H(21A) | -2462 | 863  | 4876  | 140   |
| H(21B) | -2289 | 738  | 5660  | 140   |
| H(22A) | -2912 | 1954 | 5812  | 208   |
| H(22B) | -3681 | 1442 | 5332  | 208   |
| H(22C) | -3051 | 2110 | 5032  | 208   |
| H(26)  | -664  | -102 | 1286  | 99    |
| H(27)  | -2300 | -286 | 870   | 95    |
| H(28)  | -3017 | 465  | -1    | 105   |
| H(29)  | -2117 | 1434 | -452  | 107   |
| H(32)  | 5195  | 1808 | 513   | 91    |
| H(33)  | 3914  | 724  | -135  | 87    |
| H(35)  | 4305  | 105  | -1106 | 91    |
| H(36)  | 5039  | 87   | -2036 | 104   |
| H(38)  | 6588  | 2029 | -1385 | 99    |
| H(39)  | 5826  | 2043 | -469  | 90    |
| H(40A) | 6036  | -24  | -2649 | 145   |
| H(40B) | 6702  | 424  | -3112 | 145   |
| H(41A) | 4702  | 770  | -3075 | 145   |
| H(41B) | 5371  | 1204 | -3545 | 145   |

|        |      |       |       |     |
|--------|------|-------|-------|-----|
| H(42A) | 5584 | -17   | -4067 | 214 |
| H(42B) | 4856 | -417  | -3619 | 214 |
| H(43A) | 3621 | 321   | -4092 | 202 |
| H(43B) | 4122 | -106  | -4659 | 202 |
| H(43C) | 4335 | 807   | -4497 | 202 |
| H(40C) | 6036 | -24   | -2649 | 145 |
| H(40D) | 6702 | 424   | -3112 | 145 |
| H(41C) | 4702 | 770   | -3075 | 145 |
| H(41D) | 5371 | 1204  | -3545 | 145 |
| H(42C) | 4908 | 409   | -4242 | 214 |
| H(42D) | 5658 | -164  | -3846 | 214 |
| H(43D) | 4623 | -1033 | -3779 | 232 |
| H(43E) | 4407 | -670  | -4508 | 232 |
| H(43F) | 3726 | -440  | -3963 | 232 |
| H(44A) | 7383 | 1876  | -2059 | 167 |
| H(44B) | 6759 | 2073  | -2758 | 167 |
| H(45A) | 7625 | 982   | -3204 | 351 |
| H(45B) | 8262 | 1761  | -3005 | 351 |
| H(46A) | 8315 | 315   | -2343 | 226 |
| H(46B) | 8520 | 1094  | -1896 | 226 |
| H(47A) | 9523 | 676   | -2962 | 249 |
| H(47B) | 9975 | 648   | -2198 | 249 |
| H(47C) | 9706 | 1479  | -2550 | 249 |
| H(44C) | 6821 | 2171  | -2410 | 167 |
| H(44D) | 7173 | 1614  | -2960 | 167 |
| H(45C) | 8487 | 2023  | -2256 | 150 |
| H(45D) | 8016 | 1748  | -1630 | 150 |
| H(46C) | 8335 | 484   | -1881 | 320 |
| H(46D) | 9253 | 1040  | -1664 | 320 |
| H(47D) | 8616 | 513   | -2951 | 249 |
| H(47E) | 9597 | 258   | -2492 | 249 |
| H(47F) | 9478 | 1139  | -2776 | 249 |
| H(51)  | 7649 | 1860  | 1277  | 86  |
| H(52)  | 9301 | 2176  | 1508  | 94  |
| H(53)  | 9929 | 2594  | 2557  | 96  |
| H(54)  | 8925 | 2756  | 3368  | 91  |

Table 6. Torsion angles [°].

|                        |           |                         |           |
|------------------------|-----------|-------------------------|-----------|
| C(6)-C(1)-C(2)-C(3)    | 1.8(6)    | C(9)-C(10)-C(11)-C(12)  | -1.2(8)   |
| C(7)-C(1)-C(2)-C(3)    | -179.8(4) | C(10)-C(11)-C(12)-N(1)  | 179.2(5)  |
| C(6)-C(1)-C(2)-C(23)   | -176.6(4) | C(10)-C(11)-C(12)-C(13) | -1.2(7)   |
| C(7)-C(1)-C(2)-C(23)   | 1.7(7)    | N(1)-C(12)-C(13)-C(14)  | -178.7(5) |
| C(1)-C(2)-C(3)-C(4)    | 0.2(7)    | C(11)-C(12)-C(13)-C(14) | 1.8(7)    |
| C(23)-C(2)-C(3)-C(4)   | 178.6(4)  | C(12)-C(13)-C(14)-C(9)  | 0.0(8)    |
| C(2)-C(3)-C(4)-C(5)    | -2.0(6)   | C(10)-C(9)-C(14)-C(13)  | -2.3(7)   |
| C(2)-C(3)-C(4)-C(32)   | 178.1(4)  | C(8)-C(9)-C(14)-C(13)   | -179.0(5) |
| C(3)-C(4)-C(5)-C(6)    | 1.8(6)    | N(1)-C(15)-C(16)-C(17)  | 173.6(4)  |
| C(32)-C(4)-C(5)-C(6)   | -178.3(4) | C(15)-C(16)-C(17)-C(18) | 174.3(4)  |
| C(3)-C(4)-C(5)-C(48)   | 179.6(4)  | N(1)-C(19)-C(20)-C(21)  | -178.1(4) |
| C(32)-C(4)-C(5)-C(48)  | -0.5(6)   | C(19)-C(20)-C(21)-C(22) | 172.4(5)  |
| C(4)-C(5)-C(6)-C(1)    | 0.2(7)    | C(3)-C(2)-C(23)-C(24)   | -8(5)     |
| C(48)-C(5)-C(6)-C(1)   | -177.7(4) | C(1)-C(2)-C(23)-C(24)   | 171(5)    |
| C(2)-C(1)-C(6)-C(5)    | -2.0(6)   | C(2)-C(23)-C(24)-C(25)  | -46(14)   |
| C(7)-C(1)-C(6)-C(5)    | 179.6(4)  | C(23)-C(24)-C(25)-C(26) | -174(100) |
| C(6)-C(1)-C(7)-C(8)    | -6.9(8)   | C(23)-C(24)-C(25)-C(30) | 5(11)     |
| C(2)-C(1)-C(7)-C(8)    | 174.9(5)  | C(30)-C(25)-C(26)-C(27) | -1.2(7)   |
| C(1)-C(7)-C(8)-C(9)    | 179.8(5)  | C(24)-C(25)-C(26)-C(27) | 178.3(4)  |
| C(7)-C(8)-C(9)-C(10)   | 179.4(5)  | C(25)-C(26)-C(27)-C(28) | 1.0(7)    |
| C(7)-C(8)-C(9)-C(14)   | -4.1(9)   | C(26)-C(27)-C(28)-C(29) | -0.7(8)   |
| C(14)-C(9)-C(10)-C(11) | 2.9(7)    | C(27)-C(28)-C(29)-C(30) | 0.5(8)    |
| C(8)-C(9)-C(10)-C(11)  | 179.8(5)  | C(28)-C(29)-C(30)-C(25) | -0.7(7)   |

|                             |           |                           |           |
|-----------------------------|-----------|---------------------------|-----------|
| C(28)-C(29)-C(30)-C(31)     | -177.7(5) | C(48)-C(49)-C(50)-C(55)   | 154(9)    |
| C(26)-C(25)-C(30)-C(29)     | 1.0(7)    | C(55)-C(50)-C(51)-C(52)   | -0.7(6)   |
| C(24)-C(25)-C(30)-C(29)     | -178.5(4) | C(49)-C(50)-C(51)-C(52)   | 179.7(4)  |
| C(26)-C(25)-C(30)-C(31)     | 178.0(5)  | C(50)-C(51)-C(52)-C(53)   | 1.1(7)    |
| C(24)-C(25)-C(30)-C(31)     | -1.5(7)   | C(51)-C(52)-C(53)-C(54)   | -1.3(7)   |
| C(29)-C(30)-C(31)-F(1)      | 112.9(5)  | C(52)-C(53)-C(54)-C(55)   | 1.0(7)    |
| C(25)-C(30)-C(31)-F(1)      | -64.1(6)  | C(53)-C(54)-C(55)-C(50)   | -0.5(7)   |
| C(29)-C(30)-C(31)-F(3)      | -126.4(5) | C(53)-C(54)-C(55)-C(56)   | -178.7(5) |
| C(25)-C(30)-C(31)-F(3)      | 56.6(7)   | C(51)-C(50)-C(55)-C(54)   | 0.4(6)    |
| C(29)-C(30)-C(31)-F(2)      | -8.4(8)   | C(49)-C(50)-C(55)-C(54)   | 179.9(4)  |
| C(25)-C(30)-C(31)-F(2)      | 174.6(5)  | C(51)-C(50)-C(55)-C(56)   | 178.5(4)  |
| C(3)-C(4)-C(32)-C(33)       | -27.3(7)  | C(49)-C(50)-C(55)-C(56)   | -2.0(7)   |
| C(5)-C(4)-C(32)-C(33)       | 152.8(4)  | C(54)-C(55)-C(56)-F(4)    | 2.9(7)    |
| C(4)-C(32)-C(33)-C(34)      | 176.6(4)  | C(50)-C(55)-C(56)-F(4)    | -175.2(4) |
| C(32)-C(33)-C(34)-C(35)     | 168.4(4)  | C(54)-C(55)-C(56)-F(6)    | 124.6(5)  |
| C(32)-C(33)-C(34)-C(39)     | -12.3(7)  | C(50)-C(55)-C(56)-F(6)    | -53.5(7)  |
| C(39)-C(34)-C(35)-C(36)     | -0.6(6)   | C(54)-C(55)-C(56)-F(5)    | -118.7(5) |
| C(33)-C(34)-C(35)-C(36)     | 178.8(4)  | C(50)-C(55)-C(56)-F(5)    | 63.2(6)   |
| C(34)-C(35)-C(36)-C(37)     | 1.4(7)    | C(13)-C(12)-N(1)-C(15)    | -176.5(4) |
| C(35)-C(36)-C(37)-N(2)      | -179.6(5) | C(11)-C(12)-N(1)-C(15)    | 3.0(7)    |
| C(35)-C(36)-C(37)-C(38)     | -1.6(7)   | C(13)-C(12)-N(1)-C(19)    | 16.5(7)   |
| N(2)-C(37)-C(38)-C(39)      | 179.2(4)  | C(11)-C(12)-N(1)-C(19)    | -164.0(4) |
| C(36)-C(37)-C(38)-C(39)     | 1.1(6)    | C(16)-C(15)-N(1)-C(12)    | -83.4(6)  |
| C(37)-C(38)-C(39)-C(34)     | -0.3(7)   | C(16)-C(15)-N(1)-C(19)    | 84.3(5)   |
| C(35)-C(34)-C(39)-C(38)     | 0.0(6)    | C(20)-C(19)-N(1)-C(12)    | -100.7(5) |
| C(33)-C(34)-C(39)-C(38)     | -179.3(4) | C(20)-C(19)-N(1)-C(15)    | 91.5(5)   |
| N(2)-C(40A)-C(41A)-C(42A)   | -179.0(6) | C(38)-C(37)-N(2)-C(40A)   | -177.6(5) |
| C(40A)-C(41A)-C(42A)-C(43A) | -176.2(7) | C(36)-C(37)-N(2)-C(40A)   | 0.4(7)    |
| N(2)-C(44A)-C(45A)-C(46A)   | -75(2)    | C(38)-C(37)-N(2)-C(44A)   | 0.5(8)    |
| C(44A)-C(45A)-C(46A)-C(47A) | -150(2)   | C(36)-C(37)-N(2)-C(44A)   | 178.5(5)  |
| C(6)-C(5)-C(48)-C(49)       | -3(14)    | C(41A)-C(40A)-N(2)-C(37)  | 83.0(6)   |
| C(4)-C(5)-C(48)-C(49)       | 179(100)  | C(41A)-C(40A)-N(2)-C(44A) | -95.3(6)  |
| C(5)-C(48)-C(49)-C(50)      | -162(10)  | C(45A)-C(44A)-N(2)-C(37)  | 144.6(12) |
| C(48)-C(49)-C(50)-C(51)     | -27(10)   | C(45A)-C(44A)-N(2)-C(40A) | -37.3(13) |

Symmetry transformations used to generate equivalent atoms:

## X-Ray Structure Determination, C<sub>58</sub>H<sub>56</sub>F<sub>12</sub>N<sub>2</sub>

An orange plate was mounted onto the end of a thin glass fiber using inert oil. X-ray intensity data covering the full sphere of reciprocal space were measured at 150(1) K on a Bruker SMART APEX CCD-based diffractometer (Mo K $\alpha$  radiation,  $\lambda = 0.71073$  Å).<sup>1</sup> The raw data frames were integrated with SAINT+,<sup>1</sup> which also applied corrections for Lorentz and polarization effects. The final unit cell parameters are based on the least-squares refinement of 9712 reflections from the data set with  $I > 5(\sigma)I$ . Analysis of the data showed negligible crystal decay during data collection.

Systematic absences in the intensity data were consistent with the space groups C2/c and Cc; intensity statistics indicated centricity. The structure was solved in C2/c by a combination of direct methods and difference Fourier syntheses, and refined by full-matrix least-squares against  $F^2$ , using SHELXTL.<sup>2</sup> The molecule resides on a center of symmetry. All non-hydrogen atoms were refined with anisotropic displacement parameters; hydrogen atoms were placed in geometrically idealized positions and refined with isotropic displacement parameters as riding atoms.

(1) SMART Version 5.625 and SAINT+ Version 6.02a. Bruker Analytical X-ray Systems, Inc., Madison, Wisconsin, USA, 1998.

(2) Sheldrick, G. M. SHELXTL Version 5.1; Bruker Analytical X-ray Systems, Inc., Madison, Wisconsin, USA, 1997.

**Table 1. Crystal data and structure refinement**

|                                   |                                              |                                |
|-----------------------------------|----------------------------------------------|--------------------------------|
| Identification code               | jw06s                                        |                                |
| Empirical formula                 | C58 H56 F12 N2                               |                                |
| Formula weight                    | 1009.05                                      |                                |
| Temperature                       | 150(1) K                                     |                                |
| Wavelength                        | 0.71073 Å                                    |                                |
| Crystal system                    | Monoclinic                                   |                                |
| Space group                       | C2/c                                         |                                |
| Unit cell dimensions              | a = 42.3302(15) Å                            | $\alpha = 90^\circ$ .          |
|                                   | b = 5.1937(2) Å                              | $\beta = 128.2140(10)^\circ$ . |
|                                   | c = 28.8208(11) Å                            | $\gamma = 90^\circ$ .          |
| Volume                            | 4978.4(3) Å <sup>3</sup>                     |                                |
| Z                                 | 4                                            |                                |
| Density (calculated)              | 1.346 Mg/m <sup>3</sup>                      |                                |
| Absorption coefficient            | 0.109 mm <sup>-1</sup>                       |                                |
| F(000)                            | 2104                                         |                                |
| Crystal size                      | 0.42 x 0.30 x 0.10 mm <sup>3</sup>           |                                |
| Theta range for data collection   | 1.42 to 25.04°.                              |                                |
| Index ranges                      | -50 <= h <= 49, -6 <= k <= 6, -34 <= l <= 34 |                                |
| Reflections collected             | 16856                                        |                                |
| Independent reflections           | 4406 [R(int) = 0.0428]                       |                                |
| Completeness to theta = 25.04°    | 99.8 %                                       |                                |
| Absorption correction             | None                                         |                                |
| Refinement method                 | Full-matrix least-squares on F <sup>2</sup>  |                                |
| Data / restraints / parameters    | 4406 / 0 / 356                               |                                |
| Goodness-of-fit on F <sup>2</sup> | 1.056                                        |                                |
| Final R indices [I > 2sigma(I)]   | R1 = 0.0541, wR2 = 0.1423                    |                                |
| R indices (all data)              | R1 = 0.0675, wR2 = 0.1497                    |                                |
| Extinction coefficient            | 0.0006(2)                                    |                                |
| Largest diff. peak and hole       | 0.667 and -0.385 e.Å <sup>-3</sup>           |                                |

**Table 2. Atomic coordinates ( x 10<sup>4</sup>) and equivalent isotropic displacement parameters (Å<sup>2</sup> x 10<sup>3</sup>). U(eq) is defined as one third of the trace of the orthogonalized U<sup>ij</sup> tensor.**

|       | x       | y        | z       | U(eq) |
|-------|---------|----------|---------|-------|
| C(1)  | 2824(1) | 6204(4)  | 5522(1) | 28(1) |
| C(2)  | 2893(1) | 8240(4)  | 5282(1) | 29(1) |
| C(3)  | 2582(1) | 9520(4)  | 4772(1) | 27(1) |
| C(4)  | 2672(1) | 11575(4) | 4539(1) | 30(1) |
| C(5)  | 2725(1) | 13297(4) | 4318(1) | 31(1) |
| C(6)  | 2755(1) | 15322(4) | 4009(1) | 30(1) |
| C(7)  | 3125(1) | 16143(4) | 4176(1) | 31(1) |
| C(8)  | 3141(1) | 18048(4) | 3851(1) | 32(1) |
| C(9)  | 2791(1) | 19130(4) | 3361(1) | 33(1) |
| C(10) | 2424(1) | 18337(4) | 3201(1) | 31(1) |
| C(11) | 2405(1) | 16457(4) | 3523(1) | 31(1) |
| C(12) | 3534(1) | 18902(5) | 4015(1) | 39(1) |
| C(13) | 2047(1) | 19485(4) | 2664(1) | 36(1) |
| C(14) | 3147(1) | 4764(4)  | 6041(1) | 32(1) |
| C(15) | 3542(1) | 5073(4)  | 6361(1) | 33(1) |
| C(16) | 3847(1) | 3448(4)  | 6857(1) | 32(1) |
| C(17) | 3754(1) | 1651(4)  | 7117(1) | 40(1) |
| C(18) | 4035(1) | 25(4)    | 7559(1) | 41(1) |
| C(19) | 4436(1) | 31(4)    | 7772(1) | 34(1) |
| C(20) | 4536(1) | 1896(4)  | 7530(1) | 34(1) |
| C(21) | 4249(1) | 3547(4)  | 7090(1) | 35(1) |
| C(22) | 4605(1) | -3446(4) | 8473(1) | 39(1) |
| C(23) | 4616(1) | -2218(5) | 8962(1) | 43(1) |



|       |         |          |         |        |
|-------|---------|----------|---------|--------|
| C(24) | 4428(1) | -3878(5) | 9162(1) | 48(1)  |
| C(25) | 4511(1) | -2914(6) | 9727(1) | 60(1)  |
| C(26) | 5120(1) | -1811(4) | 8382(1) | 39(1)  |
| C(27) | 5412(1) | 132(4)   | 8853(1) | 38(1)  |
| C(28) | 5838(1) | -187(5)  | 9063(1) | 42(1)  |
| C(29) | 6113(1) | 1985(5)  | 9463(1) | 49(1)  |
| F(1)  | 3848(1) | 17995(3) | 4536(1) | 59(1)  |
| F(2)  | 3570(1) | 21460(3) | 4050(1) | 54(1)  |
| F(3)  | 3587(1) | 18189(4) | 3625(1) | 68(1)  |
| F(4)  | 2030(1) | 21978(3) | 2693(1) | 85(1)  |
| F(5)  | 1718(1) | 18608(5) | 2556(1) | 117(1) |
| F(6)  | 2009(1) | 19052(4) | 2183(1) | 83(1)  |
| N(1)  | 4712(1) | -1714(3) | 8191(1) | 37(1)  |

**Table 3. Bond lengths [Å] and angles [°]**

|             |          |                   |            |                   |            |
|-------------|----------|-------------------|------------|-------------------|------------|
| C(1)-C(2)   | 1.388(3) | C(22)-N(1)        | 1.460(3)   | F(1)-C(12)-F(2)   | 106.24(19) |
| C(1)-C(3)#1 | 1.421(3) | C(22)-C(23)       | 1.521(3)   | F(3)-C(12)-C(8)   | 112.89(19) |
| C(1)-C(14)  | 1.462(3) | C(23)-C(24)       | 1.511(4)   | F(1)-C(12)-C(8)   | 113.05(19) |
| C(2)-C(3)   | 1.394(3) | C(24)-C(25)       | 1.519(4)   | F(2)-C(12)-C(8)   | 111.90(19) |
| C(3)-C(1)#1 | 1.421(3) | C(26)-N(1)        | 1.452(3)   | F(4)-C(13)-F(5)   | 105.6(2)   |
| C(3)-C(4)   | 1.433(3) | C(26)-C(27)       | 1.522(3)   | F(4)-C(13)-F(6)   | 105.2(2)   |
| C(4)-C(5)   | 1.197(3) | C(27)-C(28)       | 1.515(3)   | F(5)-C(13)-F(6)   | 105.8(2)   |
| C(5)-C(6)   | 1.431(3) | C(28)-C(29)       | 1.516(3)   | F(4)-C(13)-C(10)  | 113.3(2)   |
| C(6)-C(11)  | 1.391(3) | C(2)-C(1)-C(3)#1  | 117.03(19) | F(5)-C(13)-C(10)  | 113.88(19) |
| C(6)-C(7)   | 1.392(3) | C(2)-C(1)-C(14)   | 123.22(19) | F(6)-C(13)-C(10)  | 112.25(19) |
| C(7)-C(8)   | 1.392(3) | C(3)#1-C(1)-C(14) | 119.72(19) | C(15)-C(14)-C(1)  | 128.9(2)   |
| C(8)-C(9)   | 1.385(3) | C(1)-C(2)-C(3)    | 122.5(2)   | C(14)-C(15)-C(16) | 125.5(2)   |
| C(8)-C(12)  | 1.490(3) | C(2)-C(3)-C(1)#1  | 120.44(19) | C(21)-C(16)-C(17) | 115.6(2)   |
| C(9)-C(10)  | 1.381(3) | C(2)-C(3)-C(4)    | 119.94(19) | C(21)-C(16)-C(15) | 121.8(2)   |
| C(10)-C(11) | 1.383(3) | C(1)#1-C(3)-C(4)  | 119.62(19) | C(17)-C(16)-C(15) | 122.5(2)   |
| C(10)-C(13) | 1.497(3) | C(5)-C(4)-C(3)    | 176.3(2)   | C(18)-C(17)-C(16) | 122.7(2)   |
| C(12)-F(1)  | 1.326(3) | C(4)-C(5)-C(6)    | 175.2(2)   | C(17)-C(18)-C(19) | 121.6(2)   |
| C(12)-F(2)  | 1.332(3) | C(11)-C(6)-C(7)   | 119.13(19) | N(1)-C(19)-C(20)  | 122.6(2)   |
| C(13)-F(4)  | 1.334(3) | C(11)-C(6)-C(5)   | 119.3(2)   | N(1)-C(19)-C(18)  | 121.4(2)   |
| C(13)-F(5)  | 1.302(3) | C(7)-C(6)-C(5)    | 121.5(2)   | C(20)-C(19)-C(18) | 116.0(2)   |
| C(13)-F(6)  | 1.306(3) | C(8)-C(7)-C(6)    | 119.8(2)   | C(21)-C(20)-C(19) | 121.5(2)   |
| C(14)-C(15) | 1.311(3) | C(9)-C(8)-C(7)    | 120.6(2)   | C(20)-C(21)-C(16) | 122.5(2)   |
| C(15)-C(16) | 1.326(3) | C(9)-C(8)-C(12)   | 118.9(2)   | N(1)-C(22)-C(23)  | 114.49(19) |
| C(16)-C(17) | 1.462(3) | C(7)-C(8)-C(12)   | 120.5(2)   | C(24)-C(23)-C(22) | 113.2(2)   |
| C(16)-C(21) | 1.390(3) | C(10)-C(9)-C(8)   | 119.5(2)   | C(23)-C(24)-C(25) | 113.1(2)   |
| C(16)-C(17) | 1.398(3) | C(9)-C(10)-C(11)  | 120.3(2)   | N(1)-C(26)-C(27)  | 115.76(19) |
| C(17)-C(18) | 1.369(3) | C(9)-C(10)-C(13)  | 119.14(19) | C(28)-C(27)-C(26) | 113.13(19) |
| C(18)-C(19) | 1.405(3) | C(11)-C(10)-C(13) | 120.5(2)   | C(27)-C(28)-C(29) | 112.7(2)   |
| C(19)-N(1)  | 1.378(3) | C(10)-C(11)-C(6)  | 120.6(2)   | C(19)-N(1)-C(26)  | 121.26(19) |
| C(19)-C(20) | 1.401(3) | F(3)-C(12)-F(1)   | 106.5(2)   | C(19)-N(1)-C(22)  | 120.43(19) |
| C(20)-C(21) | 1.383(3) | F(3)-C(12)-F(2)   | 105.74(19) | C(26)-N(1)-C(22)  | 118.25(18) |

Symmetry transformations used to generate equivalent atoms:

#1 -x+1/2,-y+3/2,-z+1

**Table 4. Anisotropic displacement parameters ( $\text{\AA}^2 \times 10^3$ ). The anisotropic displacement factor exponent takes the form:  $-2\pi^2 [h^2 a^{*2} U^{11} + \dots + 2 h k a^* b^* U^{12}]$**

|       | U <sup>11</sup> | U <sup>22</sup> | U <sup>33</sup> | U <sup>23</sup> | U <sup>13</sup> | U <sup>12</sup> |
|-------|-----------------|-----------------|-----------------|-----------------|-----------------|-----------------|
| C(1)  | 32(1)           | 28(1)           | 26(1)           | 1(1)            | 19(1)           | 3(1)            |
| C(2)  | 28(1)           | 30(1)           | 29(1)           | 0(1)            | 18(1)           | 1(1)            |
| C(3)  | 31(1)           | 24(1)           | 27(1)           | 1(1)            | 18(1)           | 1(1)            |
| C(4)  | 30(1)           | 30(1)           | 27(1)           | 1(1)            | 16(1)           | 4(1)            |
| C(5)  | 32(1)           | 31(1)           | 30(1)           | 0(1)            | 18(1)           | 2(1)            |
| C(6)  | 38(1)           | 26(1)           | 29(1)           | -1(1)           | 23(1)           | 0(1)            |
| C(7)  | 34(1)           | 29(1)           | 29(1)           | -1(1)           | 19(1)           | 2(1)            |
| C(8)  | 36(1)           | 29(1)           | 33(1)           | -3(1)           | 23(1)           | -2(1)           |
| C(9)  | 44(1)           | 28(1)           | 34(1)           | 0(1)            | 27(1)           | -3(1)           |
| C(10) | 37(1)           | 29(1)           | 28(1)           | -1(1)           | 21(1)           | 1(1)            |
| C(11) | 32(1)           | 31(1)           | 32(1)           | -3(1)           | 20(1)           | -2(1)           |
| C(12) | 39(1)           | 40(1)           | 38(1)           | -3(1)           | 24(1)           | -5(1)           |
| C(13) | 39(1)           | 37(1)           | 34(1)           | 2(1)            | 23(1)           | 0(1)            |
| C(14) | 33(1)           | 30(1)           | 31(1)           | 5(1)            | 19(1)           | 0(1)            |
| C(15) | 35(1)           | 33(1)           | 32(1)           | 6(1)            | 22(1)           | 3(1)            |
| C(16) | 30(1)           | 31(1)           | 30(1)           | 2(1)            | 16(1)           | 2(1)            |
| C(17) | 25(1)           | 45(1)           | 41(1)           | 10(1)           | 16(1)           | 1(1)            |
| C(18) | 32(1)           | 38(1)           | 41(2)           | 11(1)           | 17(1)           | -2(1)           |
| C(19) | 32(1)           | 29(1)           | 30(1)           | -3(1)           | 14(1)           | 1(1)            |
| C(20) | 26(1)           | 42(1)           | 31(1)           | 1(1)            | 16(1)           | 2(1)            |
| C(21) | 33(1)           | 41(1)           | 31(1)           | 3(1)            | 21(1)           | -1(1)           |
| C(22) | 40(1)           | 29(1)           | 34(1)           | 5(1)            | 15(1)           | 4(1)            |
| C(23) | 38(1)           | 38(1)           | 40(1)           | -2(1)           | 18(1)           | 2(1)            |
| C(24) | 41(1)           | 49(2)           | 49(2)           | -1(1)           | 24(1)           | 1(1)            |
| C(25) | 47(2)           | 77(2)           | 55(2)           | 0(2)            | 31(2)           | 6(2)            |
| C(26) | 34(1)           | 35(1)           | 34(1)           | 2(1)            | 14(1)           | 9(1)            |
| C(27) | 36(1)           | 37(1)           | 34(1)           | -1(1)           | 19(1)           | 2(1)            |
| C(28) | 39(1)           | 39(1)           | 39(1)           | 1(1)            | 19(1)           | 4(1)            |
| C(29) | 39(2)           | 51(2)           | 49(2)           | -4(1)           | 23(1)           | -5(1)           |
| F(1)  | 36(1)           | 63(1)           | 61(1)           | 17(1)           | 22(1)           | -2(1)           |
| F(2)  | 47(1)           | 40(1)           | 71(1)           | 0(1)            | 35(1)           | -10(1)          |
| F(3)  | 60(1)           | 100(1)          | 72(1)           | -33(1)          | 53(1)           | -28(1)          |
| F(4)  | 83(1)           | 46(1)           | 55(1)           | -6(1)           | 7(1)            | 26(1)           |
| F(5)  | 39(1)           | 165(2)          | 105(2)          | 90(2)           | 23(1)           | 10(1)           |
| F(6)  | 97(1)           | 98(1)           | 33(1)           | 8(1)            | 29(1)           | 54(1)           |
| N(1)  | 32(1)           | 32(1)           | 35(1)           | 5(1)            | 14(1)           | 5(1)            |

**Table 5. Hydrogen coordinates ( $\times 10^4$ ) and isotropic displacement parameters ( $\text{\AA}^2 \times 10^3$ )**

|        | x    | y     | z    | U(eq) |
|--------|------|-------|------|-------|
| H(2)   | 3162 | 8782  | 5474 | 33(6) |
| H(7)   | 3367 | 15405 | 4511 | 29(6) |
| H(9)   | 2803 | 20410 | 3137 | 34(6) |
| H(11)  | 2151 | 15936 | 3411 | 32(6) |
| H(14)  | 3063 | 3421  | 6166 | 50(7) |
| H(15)  | 3634 | 6469  | 6260 | 56(8) |
| H(17)  | 3485 | 1555  | 6982 | 41(7) |
| H(18)  | 3956 | -1136 | 7726 | 62(8) |
| H(20)  | 4806 | 2030  | 7672 | 34(6) |
| H(21)  | 4329 | 4796  | 6941 | 40(7) |
| H(22A) | 4791 | -4932 | 8639 | 31(6) |
| H(22B) | 4330 | -4116 | 8167 | 46(7) |
| H(23A) | 4900 | -1870 | 9304 | 43(7) |

|        |      |       |       |        |
|--------|------|-------|-------|--------|
| H(23B) | 4473 | -547  | 8821  | 52(7)  |
| H(24A) | 4532 | -5656 | 9226  | 42(7)  |
| H(24B) | 4133 | -3934 | 8845  | 57(8)  |
| H(25A) | 4801 | -2956 | 10049 | 56(8)  |
| H(25B) | 4373 | -4021 | 9826  | 83(11) |
| H(25C) | 4413 | -1144 | 9669  | 85(11) |
| H(26A) | 5109 | -1543 | 8033  | 48(7)  |
| H(26B) | 5228 | -3561 | 8535  | 38(6)  |
| H(27A) | 5317 | 1892  | 8693  | 49(7)  |
| H(27B) | 5412 | -51   | 9195  | 62(8)  |
| H(28A) | 5833 | -266  | 8715  | 53(8)  |
| H(28B) | 5947 | -1839 | 9278  | 59(8)  |
| H(29A) | 6019 | 3606  | 9242  | 65(9)  |
| H(29B) | 6387 | 1628  | 9607  | 78(10) |
| H(29C) | 6110 | 2123  | 9800  | 74(10) |

**Table 6. Torsion angles [°]**

|                        |             |                         |           |
|------------------------|-------------|-------------------------|-----------|
| C(3)#1-C(1)-C(2)-C(3)  | -1.0(3)     | C(11)-C(10)-C(13)-F(5)  | 2.1(3)    |
| C(14)-C(1)-C(2)-C(3)   | 177.07(19)  | C(9)-C(10)-C(13)-F(6)   | 60.3(3)   |
| C(1)-C(2)-C(3)-C(1)#1  | 1.1(3)      | C(11)-C(10)-C(13)-F(6)  | -118.1(2) |
| C(1)-C(2)-C(3)-C(4)    | -178.74(19) | C(2)-C(1)-C(14)-C(15)   | -0.6(4)   |
| C(2)-C(3)-C(4)-C(5)    | 174(100)    | C(3)#1-C(1)-C(14)-C(15) | 177.5(2)  |
| C(1)#1-C(3)-C(4)-C(5)  | -6(4)       | C(1)-C(14)-C(15)-C(16)  | -176.3(2) |
| C(3)-C(4)-C(5)-C(6)    | -11(6)      | C(14)-C(15)-C(16)-C(21) | 166.2(2)  |
| C(4)-C(5)-C(6)-C(11)   | 22(3)       | C(14)-C(15)-C(16)-C(17) | -12.2(4)  |
| C(4)-C(5)-C(6)-C(7)    | -157(3)     | C(21)-C(16)-C(17)-C(18) | -2.2(4)   |
| C(11)-C(6)-C(7)-C(8)   | -1.0(3)     | C(15)-C(16)-C(17)-C(18) | 176.2(2)  |
| C(5)-C(6)-C(7)-C(8)    | 177.5(2)    | C(16)-C(17)-C(18)-C(19) | -1.3(4)   |
| C(6)-C(7)-C(8)-C(9)    | -0.2(3)     | C(17)-C(18)-C(19)-N(1)  | -176.0(2) |
| C(6)-C(7)-C(8)-C(12)   | -178.48(19) | C(17)-C(18)-C(19)-C(20) | 3.7(4)    |
| C(7)-C(8)-C(9)-C(10)   | 1.0(3)      | N(1)-C(19)-C(20)-C(21)  | 176.9(2)  |
| C(12)-C(8)-C(9)-C(10)  | 179.3(2)    | C(18)-C(19)-C(20)-C(21) | -2.8(3)   |
| C(8)-C(9)-C(10)-C(11)  | -0.6(3)     | C(19)-C(20)-C(21)-C(16) | -0.6(4)   |
| C(8)-C(9)-C(10)-C(13)  | -178.92(19) | C(17)-C(16)-C(21)-C(20) | 3.1(3)    |
| C(9)-C(10)-C(11)-C(6)  | -0.6(3)     | C(15)-C(16)-C(21)-C(20) | -175.3(2) |
| C(13)-C(10)-C(11)-C(6) | 177.67(19)  | N(1)-C(22)-C(23)-C(24)  | 168.7(2)  |
| C(7)-C(6)-C(11)-C(10)  | 1.4(3)      | C(22)-C(23)-C(24)-C(25) | 168.6(2)  |
| C(5)-C(6)-C(11)-C(10)  | -177.11(19) | N(1)-C(26)-C(27)-C(28)  | 176.1(2)  |
| C(9)-C(8)-C(12)-F(3)   | -67.9(3)    | C(26)-C(27)-C(28)-C(29) | 171.5(2)  |
| C(7)-C(8)-C(12)-F(3)   | 110.4(2)    | C(20)-C(19)-N(1)-C(26)  | -3.7(3)   |
| C(9)-C(8)-C(12)-F(1)   | 171.2(2)    | C(18)-C(19)-N(1)-C(26)  | 176.0(2)  |
| C(7)-C(8)-C(12)-F(1)   | -10.5(3)    | C(20)-C(19)-N(1)-C(22)  | 173.7(2)  |
| C(9)-C(8)-C(12)-F(2)   | 51.3(3)     | C(18)-C(19)-N(1)-C(22)  | -6.6(3)   |
| C(7)-C(8)-C(12)-F(2)   | -130.4(2)   | C(27)-C(26)-N(1)-C(19)  | 82.6(3)   |
| C(9)-C(10)-C(13)-F(4)  | -58.8(3)    | C(27)-C(26)-N(1)-C(22)  | -94.9(2)  |
| C(11)-C(10)-C(13)-F(4) | 122.9(2)    | C(23)-C(22)-N(1)-C(19)  | -79.1(3)  |
| C(9)-C(10)-C(13)-F(5)  | -179.5(2)   | C(23)-C(22)-N(1)-C(26)  | 98.4(2)   |

Symmetry transformations used to generate equivalent atoms:

#1 -x+1/2,-y+3/2,-z+1

## X-Ray Structure Determination, C<sub>42</sub>H<sub>22</sub>F<sub>12</sub>

A yellow-green blade was mounted onto the end of a thin glass fiber using inert oil. X-ray intensity data covering the full sphere of reciprocal space were measured at 150(1) K on a Bruker SMART APEX CCD-based diffractometer (Mo K $\alpha$  radiation,  $\lambda = 0.71073 \text{ \AA}$ ).<sup>1</sup> The raw data frames were integrated with SAINT+,<sup>1</sup> which also applied corrections for Lorentz and polarization effects. The final unit cell parameters are based on the least-squares refinement of 6553 reflections from the data set with  $I > 5(\sigma)I$ . Analysis of the data showed negligible crystal decay during data collection.

Systematic absences in the intensity data were consistent with the space groups P2/c and Pc; intensity statistics indicated centricity. The structure was solved in P2/c by a combination of direct methods and difference Fourier syntheses, and

refined by full-matrix least-squares against  $F^2$ , using SHELXTL.<sup>2</sup> The molecule resides on a center of symmetry. One  $-CF_3$  group (C21, F4 – F6) is rotationally disordered over two orientations in the proportion 0.68(1) / 0.32 and was refined with the aid of 18 restraints (SHELX SAME). All non-hydrogen atoms were refined with anisotropic displacement parameters; hydrogen atoms were placed in geometrically idealized positions and refined with isotropic displacement parameters as riding atoms.

(1) SMART Version 5.625 and SAINT+ Version 6.02a. Bruker Analytical X-ray Systems, Inc., Madison, Wisconsin, USA, 1998.

(2) Sheldrick, G. M. SHELXTL Version 5.1; Bruker Analytical X-ray Systems, Inc., Madison, Wisconsin, USA, 1997.

**Table 1. Crystal data and structure refinement.**

|                                      |                                        |                             |  |
|--------------------------------------|----------------------------------------|-----------------------------|--|
| Identification code                  | jw05s                                  |                             |  |
| Empirical formula                    | C42 H22 F12                            |                             |  |
| Formula weight                       | 754.60                                 |                             |  |
| Temperature                          | 150(1) K                               |                             |  |
| Wavelength                           | 0.71073 Å                              |                             |  |
| Crystal system                       | Monoclinic                             |                             |  |
| Space group                          | P2/c                                   |                             |  |
| Unit cell dimensions                 | a = 17.8688(14) Å                      | $\alpha = 90^\circ$ .       |  |
|                                      | b = 5.0625(4) Å                        | $\beta = 97.617(2)^\circ$ . |  |
|                                      | c = 18.6933(15) Å                      | $\gamma = 90^\circ$ .       |  |
| Volume                               | 1676.1(2) Å <sup>3</sup>               |                             |  |
| Z                                    | 2                                      |                             |  |
| Density (calculated)                 | 1.495 Mg/m <sup>3</sup>                |                             |  |
| Absorption coefficient               | 0.133 mm <sup>-1</sup>                 |                             |  |
| F(000)                               | 764                                    |                             |  |
| Crystal size                         | 0.72 x 0.30 x 0.04 mm <sup>3</sup>     |                             |  |
| Theta range for data collection      | 2.20 to 24.11°.                        |                             |  |
| Index ranges                         | -20 ≤ h ≤ 20, -5 ≤ k ≤ 5, -21 ≤ l ≤ 21 |                             |  |
| Reflections collected                | 9956                                   |                             |  |
| Independent reflections              | 2664 [R(int) = 0.0360]                 |                             |  |
| Completeness to theta = 24.11°       | 100.0 %                                |                             |  |
| Absorption correction                | None                                   |                             |  |
| Refinement method                    | Full-matrix least-squares on $F^2$     |                             |  |
| Data / restraints / parameters       | 2664 / 18 / 284                        |                             |  |
| Goodness-of-fit on $F^2$             | 1.010                                  |                             |  |
| Final R indices [ $I > 2\sigma(I)$ ] | R1 = 0.0546, wR2 = 0.1344              |                             |  |
| R indices (all data)                 | R1 = 0.0662, wR2 = 0.1421              |                             |  |
| Extinction coefficient               | 0.0027(10)                             |                             |  |
| Largest diff. peak and hole          | 0.196 and -0.204 e.Å <sup>-3</sup>     |                             |  |

**Table 2. Atomic coordinates (x 10<sup>4</sup>) and equivalent isotropic displacement parameters (Å<sup>2</sup> x 10<sup>3</sup>). U(eq) is defined as one third of the trace of the orthogonalized  $U^{ij}$  tensor.**

|       | x       | y        | z       | U(eq) |
|-------|---------|----------|---------|-------|
| C(1)  | 4235(1) | 307(5)   | 5128(1) | 35(1) |
| C(2)  | 4816(1) | 1805(5)  | 5501(1) | 38(1) |
| C(3)  | 5566(1) | 1541(5)  | 5380(1) | 34(1) |
| C(4)  | 6127(1) | 3185(5)  | 5792(1) | 35(1) |
| C(5)  | 6557(1) | 4623(5)  | 6135(1) | 36(1) |
| C(6)  | 7069(1) | 6492(5)  | 6510(1) | 35(1) |
| C(7)  | 7785(1) | 6841(5)  | 6305(2) | 41(1) |
| C(8)  | 8274(2) | 8727(6)  | 6631(2) | 47(1) |
| C(9)  | 8067(2) | 10284(6) | 7168(2) | 47(1) |
| C(10) | 7365(2) | 9952(6)  | 7391(2) | 45(1) |
| C(11) | 6868(1) | 8072(5)  | 7075(1) | 36(1) |
| C(13) | 3447(1) | 625(5)   | 5244(1) | 37(1) |
| C(14) | 3168(1) | 2525(5)  | 5618(1) | 39(1) |

|        |         |          |         |        |
|--------|---------|----------|---------|--------|
| C(15)  | 2380(1) | 2868(5)  | 5737(1) | 37(1)  |
| C(16)  | 1795(1) | 1220(6)  | 5434(2) | 43(1)  |
| C(17)  | 1068(2) | 1598(6)  | 5571(2) | 47(1)  |
| C(18)  | 894(2)  | 3636(6)  | 6018(2) | 43(1)  |
| C(19)  | 1464(2) | 5293(6)  | 6317(2) | 46(1)  |
| C(20)  | 2193(2) | 4911(6)  | 6175(2) | 44(1)  |
| C(12)  | 6119(2) | 7697(6)  | 7337(1) | 46(1)  |
| F(1)   | 5540(1) | 8112(4)  | 6834(1) | 66(1)  |
| F(2)   | 6035(1) | 5252(4)  | 7582(1) | 61(1)  |
| F(3)   | 6033(1) | 9295(4)  | 7888(1) | 79(1)  |
| C(21A) | 107(2)  | 4005(6)  | 6173(2) | 59(1)  |
| F(4A)  | -413(3) | 3338(16) | 5652(2) | 99(3)  |
| F(5A)  | -38(4)  | 6350(10) | 6410(7) | 155(4) |
| F(6A)  | -33(3)  | 2405(12) | 6702(3) | 80(2)  |
| C(21B) | 107(2)  | 4005(6)  | 6173(2) | 59(1)  |
| F(4B)  | -18(9)  | 3860(40) | 6837(5) | 147(9) |
| F(5B)  | -397(7) | 2530(30) | 5777(9) | 135(8) |
| F(6B)  | -121(7) | 6430(18) | 5957(7) | 87(4)  |

**Table 3. Bond lengths [Å] and angles [°].**

|              |          |                   |          |                    |          |
|--------------|----------|-------------------|----------|--------------------|----------|
| C(1)-C(2)    | 1.395(4) | C(12)-F(3)        | 1.334(3) | C(13)-C(14)-C(15)  | 127.1(2) |
| C(1)-C(3)#1  | 1.412(4) | C(12)-F(2)        | 1.335(3) | C(20)-C(15)-C(16)  | 117.4(2) |
| C(1)-C(13)   | 1.463(4) | C(21A)-F(4A)      | 1.298(5) | C(20)-C(15)-C(14)  | 119.3(2) |
| C(2)-C(3)    | 1.395(4) | C(21A)-F(5A)      | 1.305(5) | C(16)-C(15)-C(14)  | 123.4(2) |
| C(3)-C(1)#1  | 1.412(4) | C(21A)-F(6A)      | 1.328(5) | C(17)-C(16)-C(15)  | 121.1(3) |
| C(3)-C(4)    | 1.444(4) | C(2)-C(1)-C(3)#1  | 117.4(2) | C(16)-C(17)-C(18)  | 120.7(3) |
| C(4)-C(5)    | 1.183(4) | C(2)-C(1)-C(13)   | 122.3(2) | C(19)-C(18)-C(17)  | 118.9(3) |
| C(5)-C(6)    | 1.434(4) | C(3)#1-C(1)-C(13) | 120.4(2) | C(19)-C(18)-C(21A) | 120.8(3) |
| C(6)-C(7)    | 1.395(4) | C(1)-C(2)-C(3)    | 122.3(2) | C(17)-C(18)-C(21A) | 120.3(3) |
| C(6)-C(11)   | 1.408(4) | C(2)-C(3)-C(1)#1  | 120.3(2) | C(20)-C(19)-C(18)  | 120.2(3) |
| C(7)-C(8)    | 1.381(4) | C(2)-C(3)-C(4)    | 118.2(2) | C(19)-C(20)-C(15)  | 121.8(3) |
| C(8)-C(9)    | 1.366(4) | C(1)#1-C(3)-C(4)  | 121.4(2) | F(1)-C(12)-F(3)    | 107.2(2) |
| C(9)-C(10)   | 1.383(4) | C(5)-C(4)-C(3)    | 176.5(3) | F(1)-C(12)-F(2)    | 106.2(2) |
| C(10)-C(11)  | 1.380(4) | C(4)-C(5)-C(6)    | 176.0(3) | F(3)-C(12)-F(2)    | 105.5(2) |
| C(11)-C(12)  | 1.497(4) | C(7)-C(6)-C(11)   | 118.0(2) | F(1)-C(12)-C(11)   | 113.4(2) |
| C(13)-C(14)  | 1.325(4) | C(7)-C(6)-C(5)    | 119.9(2) | F(3)-C(12)-C(11)   | 112.0(2) |
| C(14)-C(15)  | 1.465(4) | C(11)-C(6)-C(5)   | 122.1(2) | F(2)-C(12)-C(11)   | 112.0(2) |
| C(15)-C(20)  | 1.386(4) | C(8)-C(7)-C(6)    | 121.1(3) | F(4A)-C(21A)-F(5A) | 109.7(5) |
| C(15)-C(16)  | 1.397(4) | C(9)-C(8)-C(7)    | 120.4(3) | F(4A)-C(21A)-F(6A) | 102.3(4) |
| C(16)-C(17)  | 1.370(4) | C(8)-C(9)-C(10)   | 119.8(3) | F(5A)-C(21A)-F(6A) | 103.7(5) |
| C(17)-C(18)  | 1.388(4) | C(11)-C(10)-C(9)  | 120.8(3) | F(4A)-C(21A)-C(18) | 115.0(4) |
| C(18)-C(19)  | 1.379(4) | C(10)-C(11)-C(6)  | 119.9(2) | F(5A)-C(21A)-C(18) | 114.6(4) |
| C(18)-C(21A) | 1.485(4) | C(10)-C(11)-C(12) | 120.0(2) | F(6A)-C(21A)-C(18) | 110.2(3) |
| C(19)-C(20)  | 1.378(4) | C(6)-C(11)-C(12)  | 120.1(2) |                    |          |
| C(12)-F(1)   | 1.318(3) | C(14)-C(13)-C(1)  | 126.5(2) |                    |          |

Symmetry transformations used to generate equivalent atoms:

#1 -x+1,-y,-z+1

**Table 4. Anisotropic displacement parameters ( $\text{\AA}^2 \times 10^3$ ). The anisotropic displacement factor exponent takes the form:  $-2\pi^2 [h^2 a^{*2} U^{11} + \dots + 2 h k a^* b^* U^{12}]$**

|        | U <sup>11</sup> | U <sup>22</sup> | U <sup>33</sup> | U <sup>23</sup> | U <sup>13</sup> | U <sup>12</sup> |
|--------|-----------------|-----------------|-----------------|-----------------|-----------------|-----------------|
| C(1)   | 34(1)           | 35(2)           | 35(1)           | 4(1)            | 0(1)            | -2(1)           |
| C(2)   | 40(1)           | 36(2)           | 36(1)           | -1(1)           | 2(1)            | -1(1)           |
| C(3)   | 35(1)           | 32(1)           | 34(1)           | 5(1)            | -1(1)           | -4(1)           |
| C(4)   | 32(1)           | 35(2)           | 37(1)           | 4(1)            | 3(1)            | 0(1)            |
| C(5)   | 36(1)           | 36(2)           | 37(1)           | 4(1)            | 6(1)            | 2(1)            |
| C(6)   | 35(1)           | 31(1)           | 36(1)           | 4(1)            | -1(1)           | -1(1)           |
| C(7)   | 39(1)           | 39(2)           | 46(2)           | -1(1)           | 5(1)            | 0(1)            |
| C(8)   | 37(2)           | 45(2)           | 58(2)           | 6(2)            | 3(1)            | -6(1)           |
| C(9)   | 46(2)           | 38(2)           | 54(2)           | 3(1)            | -8(1)           | -11(1)          |
| C(10)  | 57(2)           | 36(2)           | 41(2)           | -3(1)           | 0(1)            | 0(1)            |
| C(11)  | 42(1)           | 27(1)           | 38(1)           | 4(1)            | 0(1)            | -1(1)           |
| C(13)  | 38(1)           | 35(2)           | 35(1)           | 4(1)            | -2(1)           | -7(1)           |
| C(14)  | 37(1)           | 38(2)           | 40(1)           | 1(1)            | -1(1)           | -5(1)           |
| C(15)  | 41(1)           | 35(2)           | 35(1)           | 6(1)            | 2(1)            | 1(1)            |
| C(16)  | 41(2)           | 42(2)           | 46(2)           | -4(1)           | 7(1)            | -2(1)           |
| C(17)  | 41(2)           | 44(2)           | 57(2)           | 1(2)            | 6(1)            | -5(1)           |
| C(18)  | 42(2)           | 40(2)           | 49(2)           | 11(1)           | 9(1)            | 3(1)            |
| C(19)  | 51(2)           | 41(2)           | 47(2)           | -3(1)           | 9(1)            | 7(1)            |
| C(20)  | 44(2)           | 41(2)           | 47(2)           | -1(1)           | 1(1)            | -1(1)           |
| C(12)  | 48(2)           | 46(2)           | 43(2)           | 1(1)            | 4(1)            | -2(1)           |
| F(1)   | 39(1)           | 89(2)           | 69(1)           | 17(1)           | 8(1)            | 12(1)           |
| F(2)   | 54(1)           | 60(1)           | 71(1)           | 18(1)           | 18(1)           | -5(1)           |
| F(3)   | 76(1)           | 85(2)           | 83(1)           | -36(1)          | 38(1)           | -10(1)          |
| C(21A) | 53(2)           | 59(3)           | 67(2)           | 1(2)            | 18(2)           | 7(2)            |
| F(4A)  | 40(3)           | 193(8)          | 61(2)           | 12(3)           | 0(2)            | 30(3)           |
| F(5A)  | 82(4)           | 69(4)           | 338(14)         | -63(5)          | 115(7)          | -9(3)           |
| F(6A)  | 56(2)           | 119(4)          | 71(3)           | 10(3)           | 32(2)           | -6(2)           |
| C(21B) | 53(2)           | 59(3)           | 67(2)           | 1(2)            | 18(2)           | 7(2)            |
| F(4B)  | 91(8)           | 300(30)         | 54(5)           | -4(11)          | 26(5)           | 80(15)          |
| F(5B)  | 61(7)           | 81(7)           | 270(20)         | -102(10)        | 61(10)          | -45(6)          |
| F(6B)  | 55(5)           | 76(7)           | 140(9)          | 36(7)           | 48(6)           | 40(5)           |

**Table 5. Hydrogen coordinates ( $\times 10^4$ ) and isotropic displacement parameters ( $\text{\AA}^2 \times 10^3$ ).**

|       | x    | y     | z    | U(eq)  |
|-------|------|-------|------|--------|
| H(2)  | 4696 | 3049  | 5849 | 36(7)  |
| H(7)  | 7938 | 5763  | 5934 | 44(8)  |
| H(8)  | 8758 | 8944  | 6480 | 59(9)  |
| H(9)  | 8403 | 11589 | 7388 | 66(10) |
| H(10) | 7223 | 11032 | 7766 | 37(7)  |
| H(13) | 3099 | -659  | 5029 | 42(7)  |
| H(14) | 3517 | 3803  | 5833 | 47(8)  |
| H(16) | 1903 | -188  | 5128 | 47(8)  |
| H(17) | 680  | 455   | 5359 | 51(8)  |
| H(19) | 1353 | 6701  | 6623 | 48(8)  |
| H(20) | 2578 | 6079  | 6382 | 45(8)  |

**Table 6. Torsion angles [°]**

|                         |           |                          |           |
|-------------------------|-----------|--------------------------|-----------|
| C(3)#1-C(1)-C(2)-C(3)   | 0.6(4)    | C(13)-C(14)-C(15)-C(16)  | -2.6(4)   |
| C(13)-C(1)-C(2)-C(3)    | -178.7(2) | C(20)-C(15)-C(16)-C(17)  | -0.6(4)   |
| C(1)-C(2)-C(3)-C(1)#1   | -0.6(4)   | C(14)-C(15)-C(16)-C(17)  | 178.9(3)  |
| C(1)-C(2)-C(3)-C(4)     | 179.9(2)  | C(15)-C(16)-C(17)-C(18)  | -0.1(4)   |
| C(2)-C(3)-C(4)-C(5)     | -22(5)    | C(16)-C(17)-C(18)-C(19)  | 0.6(4)    |
| C(1)#1-C(3)-C(4)-C(5)   | 159(4)    | C(16)-C(17)-C(18)-C(21A) | -179.0(3) |
| C(3)-C(4)-C(5)-C(6)     | -71(7)    | C(17)-C(18)-C(19)-C(20)  | -0.3(4)   |
| C(4)-C(5)-C(6)-C(7)     | -75(4)    | C(21A)-C(18)-C(19)-C(20) | 179.4(3)  |
| C(4)-C(5)-C(6)-C(11)    | 103(4)    | C(18)-C(19)-C(20)-C(15)  | -0.5(4)   |
| C(11)-C(6)-C(7)-C(8)    | -1.8(4)   | C(16)-C(15)-C(20)-C(19)  | 1.0(4)    |
| C(5)-C(6)-C(7)-C(8)     | 176.5(2)  | C(14)-C(15)-C(20)-C(19)  | -178.6(3) |
| C(6)-C(7)-C(8)-C(9)     | 0.5(4)    | C(10)-C(11)-C(12)-F(1)   | 119.9(3)  |
| C(7)-C(8)-C(9)-C(10)    | 0.5(4)    | C(6)-C(11)-C(12)-F(1)    | -60.7(3)  |
| C(8)-C(9)-C(10)-C(11)   | -0.3(4)   | C(10)-C(11)-C(12)-F(3)   | -1.5(4)   |
| C(9)-C(10)-C(11)-C(6)   | -1.0(4)   | C(6)-C(11)-C(12)-F(3)    | 177.9(2)  |
| C(9)-C(10)-C(11)-C(12)  | 178.4(3)  | C(10)-C(11)-C(12)-F(2)   | -119.9(3) |
| C(7)-C(6)-C(11)-C(10)   | 2.0(4)    | C(6)-C(11)-C(12)-F(2)    | 59.6(3)   |
| C(5)-C(6)-C(11)-C(10)   | -176.2(2) | C(19)-C(18)-C(21A)-F(4A) | 148.3(5)  |
| C(7)-C(6)-C(11)-C(12)   | -177.5(2) | C(17)-C(18)-C(21A)-F(4A) | -32.1(5)  |
| C(5)-C(6)-C(11)-C(12)   | 4.4(4)    | C(19)-C(18)-C(21A)-F(5A) | 19.8(8)   |
| C(2)-C(1)-C(13)-C(14)   | 9.9(4)    | C(17)-C(18)-C(21A)-F(5A) | -160.6(7) |
| C(3)#1-C(1)-C(13)-C(14) | -169.3(3) | C(19)-C(18)-C(21A)-F(6A) | -96.7(4)  |
| C(1)-C(13)-C(14)-C(15)  | 179.9(2)  | C(17)-C(18)-C(21A)-F(6A) | 82.9(4)   |
| C(13)-C(14)-C(15)-C(20) | 176.9(3)  |                          |           |

Symmetry transformations used to generate equivalent atoms:

#1 -x+1,-y,-z+1

## Simulated and observed electron diffraction of a microcrystal of **3** (C<sub>42</sub>H<sub>22</sub>F<sub>12</sub>).

Top left: simulated electron diffraction obtained by cerius<sup>2</sup>. Top right: corresponding experimental electron diffraction pattern, processed. Bottom: Raw diffraction pattern after contrast enhancement by Microsoft Word program.

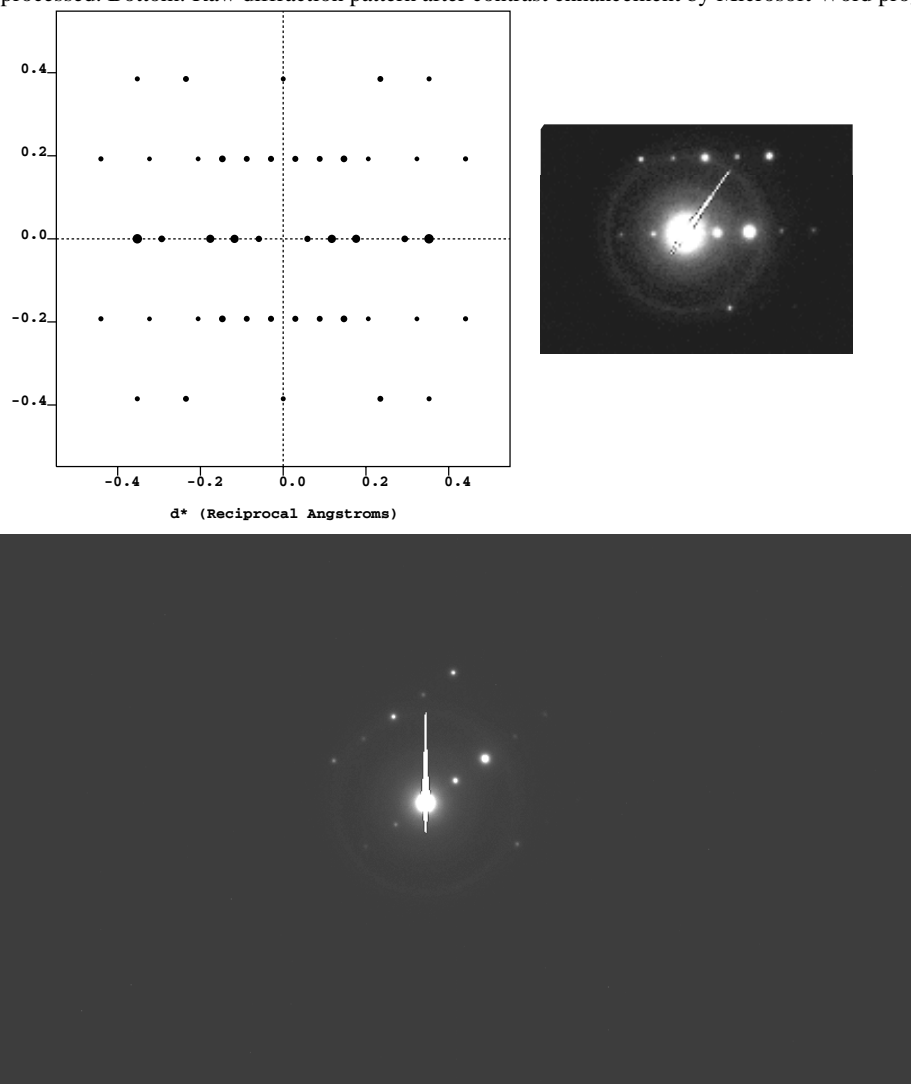

File Name = CRYSTAL\_g6C.tif

JWEA1

Print Mag = 0x @ 0 in

Acquired Dec 18 2003 at 6:05 PM

500 nm

HV=200kV

TEM Mag = 30000x

The crystals of **3** were very small and of comparatively low quality. They were slightly bent and not perfectly oriented with respect to the diffraction plane. As a consequence only a section of the expected diffraction pattern is visible. The calculated values are in perfect match when comparing experiment and simulation. The crystals are oriented such that one looks onto a plane that is defined by the crystallographic axes *a* and *b*.
